# Supplementary material for: A Dynamic Core in Human NQO1 Controls the Functional and Stability Effects of Ligand Binding and Their Communication across the Enzyme Dimer
Source: PubMed Central journal article supplement (PMC6921033; doi:10.3390/biom9110728), 2019-11-12
Supplement: biomolecules-09-00728-s001.pdf [file biomolecules-09-00728-s001.pdf]

**SUPPLEMENTARY INFORMATION**

**A dynamic core in human NQO1 controls the functional and stability effects of ligand binding and their communication across the enzyme dimer**

Pavla Vankova, Eduardo Salido, David J. Timson, Petr Man and Angel L. Pey

**Includes Figures S1-S11 and Tables S1-S2.**

**Figure S1. Purity and activity of the NQO1 protein.** A) SDS-PAGE analysis (12 % acrylamide) of NQO1 protein purified upon expression in *E. coli*. Different gels show purified NQO1 protein (6-8  $\mu\text{g}$ ) as holo- and apo-proteins, respectively. Gels were stained with Coomassie® Brilliant blue R250 (Sigma-Aldrich). B) Enzyme kinetic analysis of holo-NQO1 in the presence of a fixed DCPIP concentration (20  $\mu\text{M}$ ) and variable concentrations of NADH. Prior to the assay, 1 nM holo-NQO1 was incubated in K-HEPES 50 mM pH 7.4 with NADH for 5 min at 25°C and the reaction triggered by adding DCPIP. Blanks in the absence of enzyme were also measured and subtracted. The specific activity was determined spectrophotometrically essentially as described [1]. Each point represents the average of two replicates. Data were collected in three independent experimental series. The line is a fit to the Michaelis-Menten equation providing values of  $k_{\text{cat}}$  and  $K_{\text{M(NADH)}}$  of  $50 \pm 4 \text{ s}^{-1}$  and  $540 \pm 90 \mu\text{M}$ , respectively.

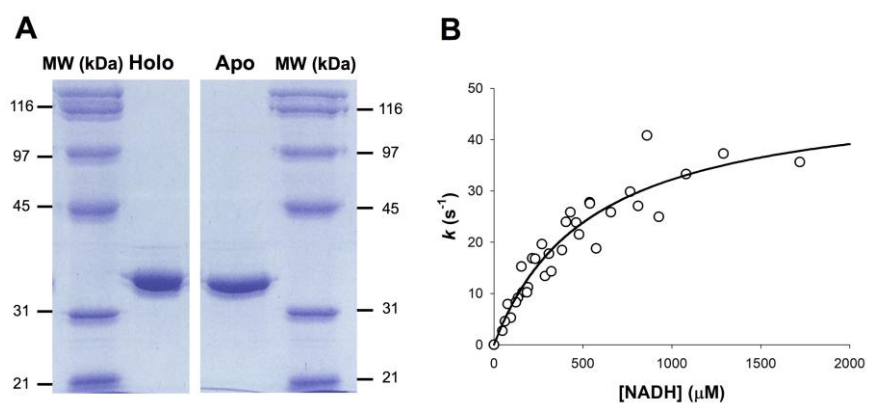

**Figure S2. Verification of the NQ01 protein by high resolution mass spectrometry.** NQ01 was offline desalted on a Protein OptiTrap (Optimize Technologies). Then 5  $\mu$ M sample was directly infused into an ESI source of 15T FT-ICR MS (solariX XR, Bruker Daltonics) and the spectra were recorded in a broad band mode with 2M data points. Spectrum shows the entire charge state envelope (detected charges 19+ to 48+) and inset demonstrates the high resolving power and isotopic pattern for charge state 32+. Spectrum was deconvoluted using the SNAP algorithm (DataAnalysis 5.0). Calculated monoisotopic mass and the experimental deconvoluted values are shown together with the error in ppm. The precise mass exactly fits to the sequence of the construct (shown below the spectrum) without the N-terminal methionine (shown in grey). Grey highlight shows the His-tag sequence. This is also indicated by the negative (non-native) numbering.

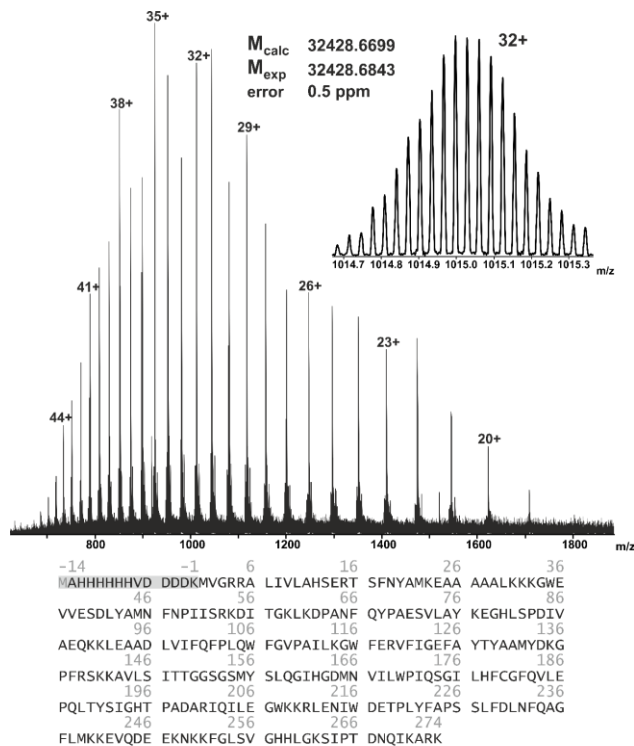

**Figure S3. NQO1 dimeric state confirmed by mass spectrometry.** NQO1<sub>apo</sub> (A) and NQO1<sub>holo</sub> (B) were transferred into 100 mM ammonium acetate pH 7.5 by Zeba spin (Thermo Fisher) desalting columns. Protein solution was transferred into a home-made quartz nESI emitter that was mounted to an nESI source of Synapt G2Si (Waters). Spray voltage was kept at 0.7 kV. Temperature was 20 °C, sampling cone and source offset were 50 V and 20 V, respectively. Trap collisional cooling (CE) of 80 V was required to achieve better S/N and resolution. The analyses proved that NQO1 forms stable dimer in both states. Charge states of individual peaks are shown. Dimeric protein state is indicated by two circles – open for NQO1<sub>apo</sub> and closed for NQO1<sub>holo</sub>.

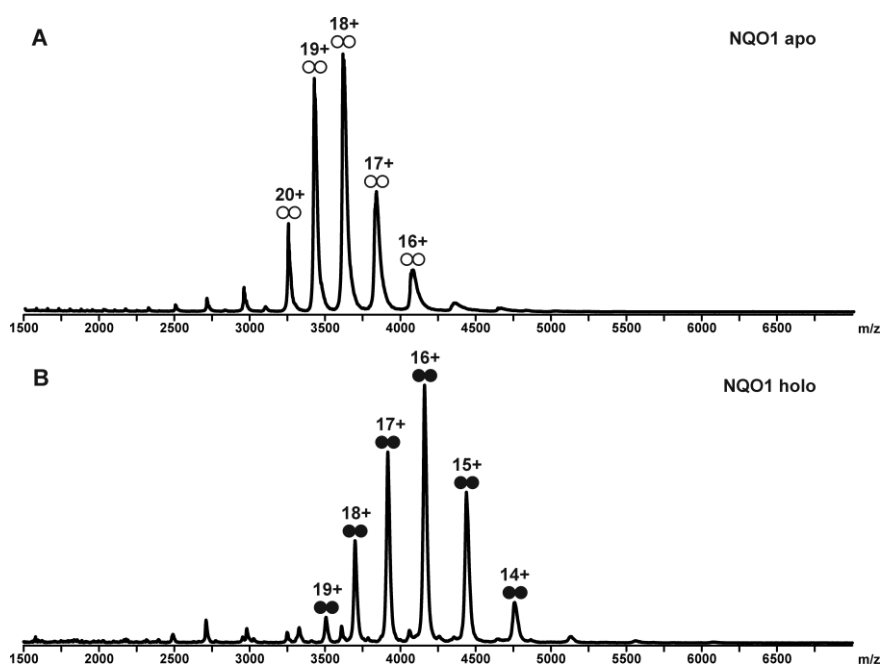

**Figure S4. HDXMS mapping.** NQ01 peptide map representing sequence coverage in the HDXMS study. Protein was digested online by a serial combination of Nepenthesin-2 and Pepsin. This yielded 140 peptides with the average peptide length 8.3 amino acids and redundancy score 4.05 covering nearly 99% of the sequence. Peptides were identified by LC-MS/MS analysis and MASCOT searching as described previously. Coverage is shown on the sequence of the construct with numbering reflecting native one. Secondary structure elements are shown as cylinders (alpha helices) and arrows (beta sheets). Numbering of loops is also indicated (L1-L10) above the sequence. The His-tag is highlighted as a grey box. Map was created using MStools

Deleted: -  
Deleted: -

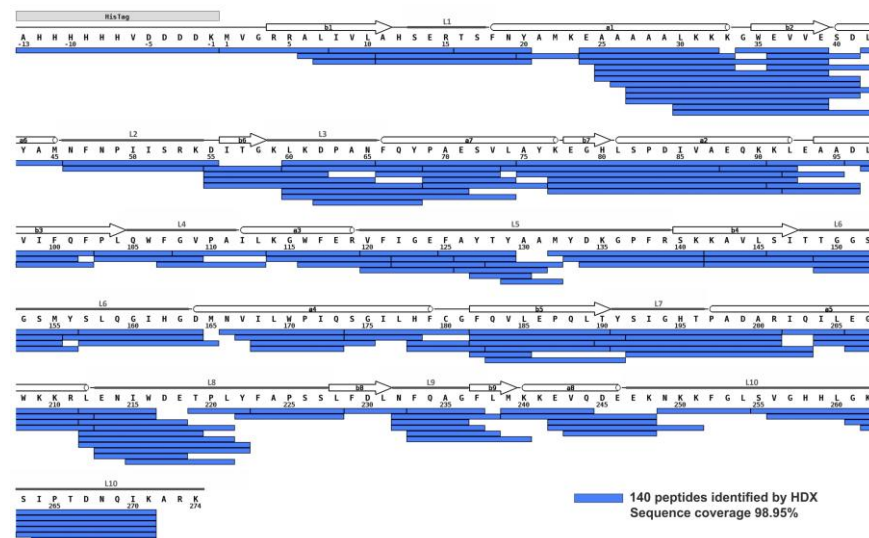

**Figure S5. Representative examples of rare EX1/EX2 exchange profiles.** The NQO1 protein showed predominantly EX2 exchange behavior in all ligation states as well as in the apo form. Exceptions were two regions covered by peptides 75-90, 77-90, 77-91, 77-92 and 249-254, 255-271, 256-271, 261-271, 262-271, 263-271, 264-271 where very small EX1 signatures were detected. Two representative examples are shown in this figure. A) Peptide 77-92 where top left graph shows peak width detected at 1% of the MS peak intensity as a function of time. Other three panels are showing isotopic envelopes of NQO1<sub>apo</sub>, NQO1<sub>holo</sub> and NQO1<sub>dic</sub> at 300 s of exchange (position in the graph indicate this time point). B) peptide 255-271, peak width is again in the top left part of the panel and the other three panels show mass spectra of NQO1<sub>apo</sub>, NQO1<sub>holo</sub> and NQO1<sub>dic</sub> at 10 s of exchange (position in the graph indicate this time point).

Deleted: for dicoumarol and wild-type states respectively.

Deleted: p

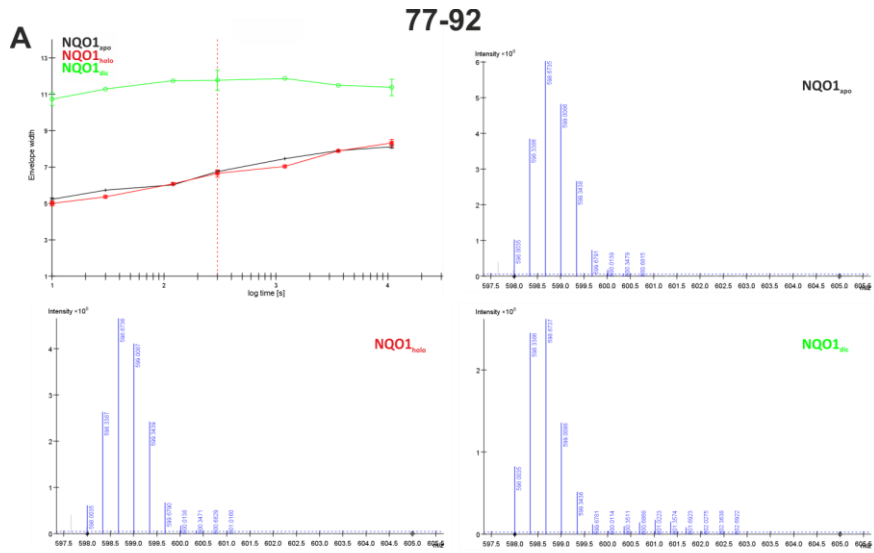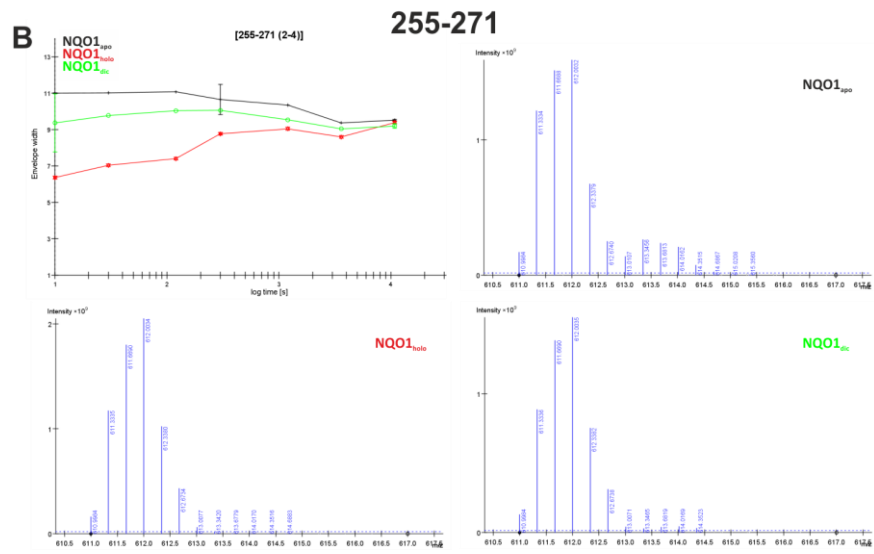

**Figure S6 (1 of 3). HDX kinetics for NQO1 segments (spanning residues 1-95) of NQO1 upon FAD and dicoumarol binding.** Plots show percentage of deuteration as a function of time. Segment limits are shown in each graph. Kinetic analysis can be found in Table S1.

Deleted: ing

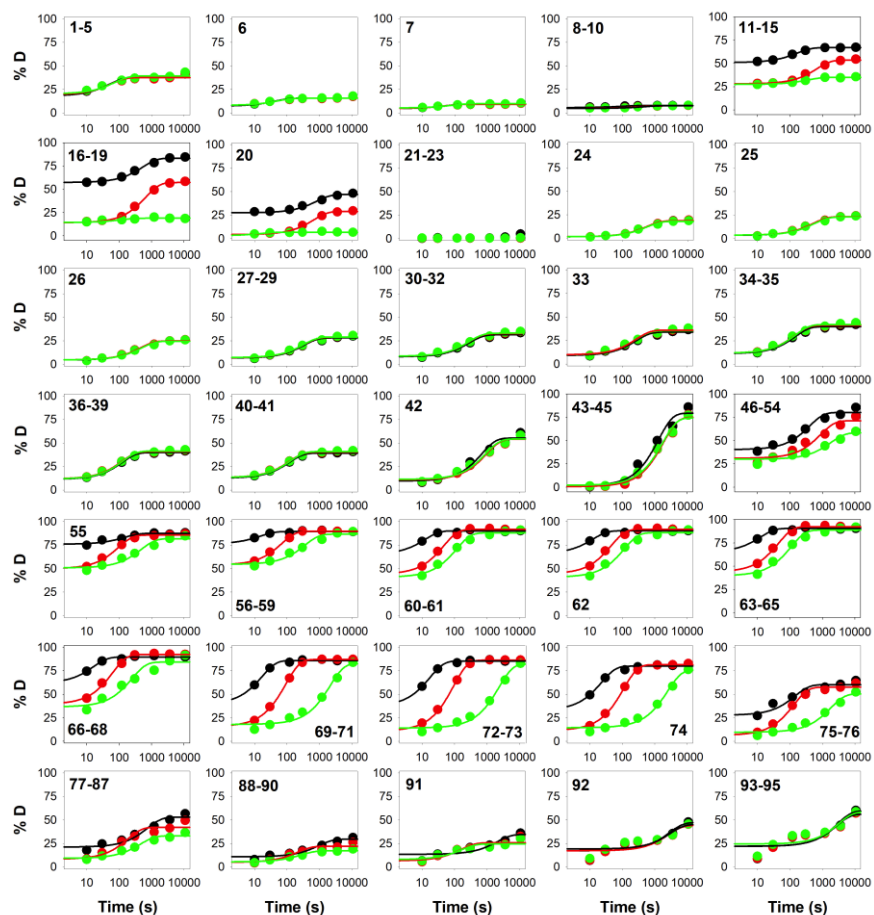



**Figure S6 (2 of 3). HDX kinetics for NQ01 segments (spanning residues 96-181) of NQ01 upon FAD and dicoumarol binding.** Plots show percentage of deuteration as a function of time. Segment limits are shown in each graph. Kinetic analysis can be found in Table S1.

Deleted: ing

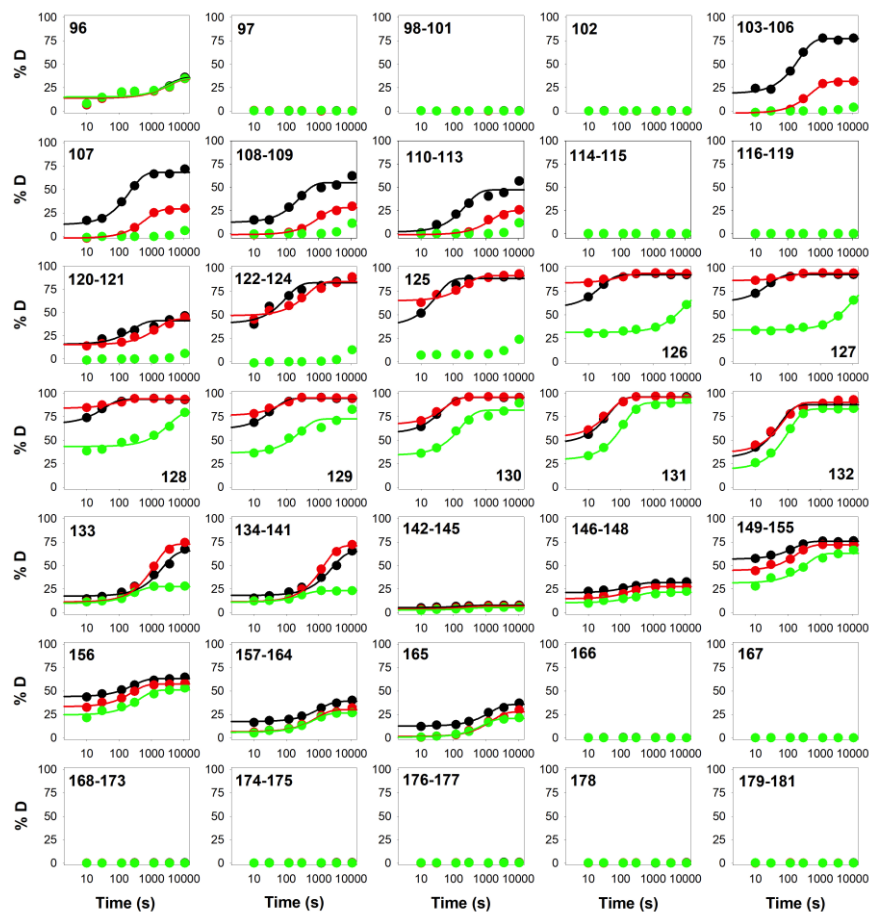

**Figure S6 (3 of 3). HDX kinetics for NQO1 segments (spanning residues 182-271) of NQO1 upon FAD and dicoumarol binding.** Plots show percentage of deuteration as a function of time. Segment limits are shown in each graph. Kinetic analysis can be found in Table S1.

Deleted: ing

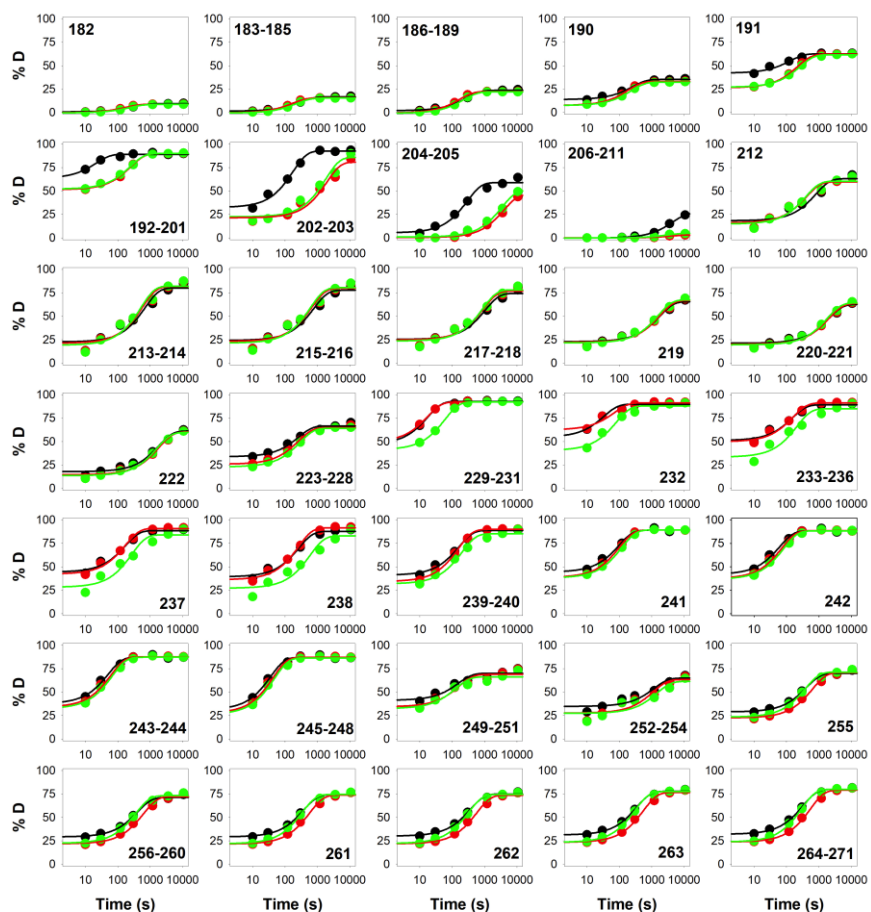

**Figure S7. HDX kinetics for 39 non-overlapping and non-redundant peptides of NQO1 upon FAD and dicoumarol binding.** Plots show percentage of deuteration as a function of time. Peptide limits are shown in each graph. These analyses are meant to be compared with those displayed in Figures S6. Kinetic analyses can be found in Table S2.

Deleted: ing

Deleted: 7-S9

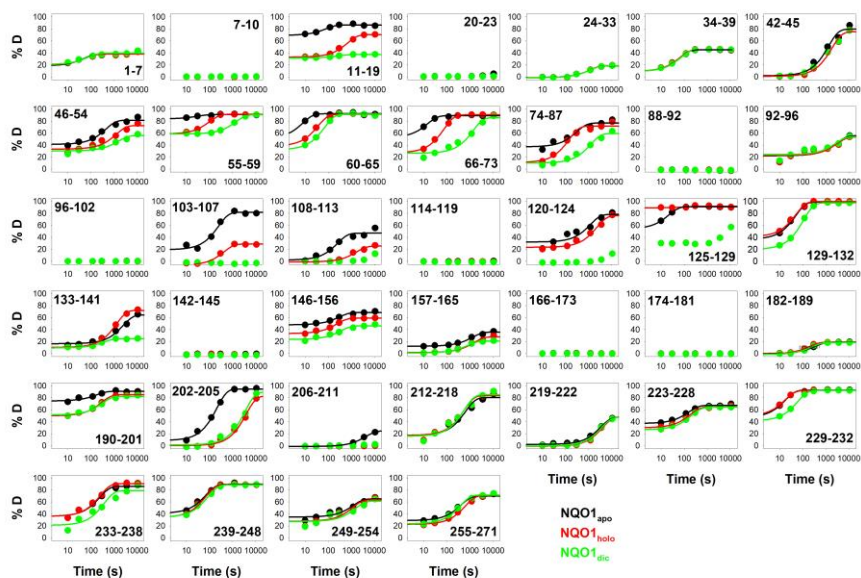

**Figure S8. Non-exchanging peptides define a minimal stable core in NQO1<sub>apo</sub>.**

A) Plot of the % SASA for individual residues (considering backbone and side-chain) calculated as indicated Figure 3. Secondary structure elements are depicted according to [3]; B) Structural representation of non-exchanging residues (using PDB 2F10; [4]). The left panel shows a surface representation highlighting the burial of the minimal and stable core. The middle panel shows segments belonging to this core plotted onto secondary structures. The right panel shows that the core may contribute to the stable folding of the individual monomers as well as their assembly into the dimer, with only some stable contacts with the FAD (in orange ball representation) and the dicoumarol (in yellow ball representation). Note that this analysis for the 39 experimental peptides (Table S2) only shows small differences (a longer  $\alpha 1$  helix and a *new* non-exchanging short segment in helix  $\alpha 2$ ) vs. those carried out with NQO1 segments (Table S1 and Figure 3).

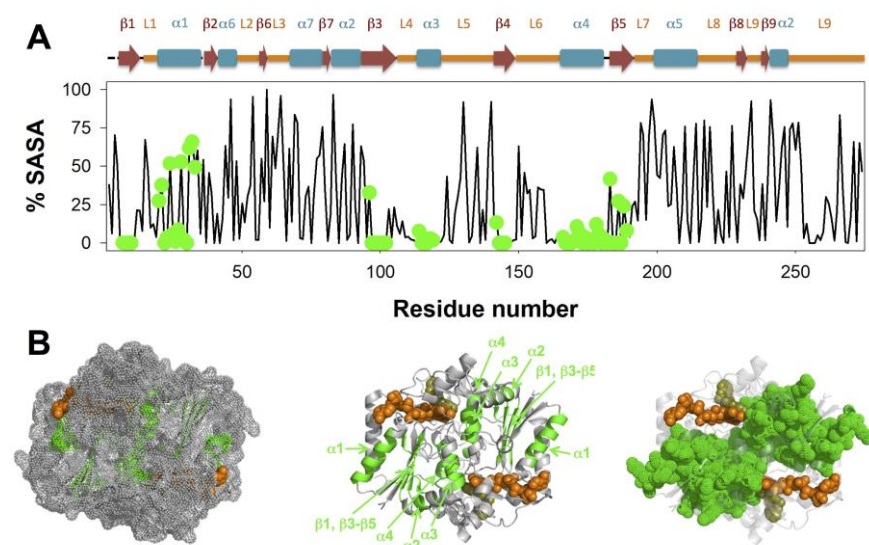

**Figure S9. Specific HDX kinetics for 39 peptides of NQO1<sub>apo</sub>.** A) Plots of the amplitudes for the burst- and slow-phase in HDX for peptides (upper panel) and rate constant for the slow phase (lower panel) for peptides with at least 20% D after 3 h. The elements of secondary structure along the protein sequence are also indicated. Note that this analysis for the 39 experimental peptides (Table S2) show little differences when compared with those carried out with NQO1 segments (Table S1 and Figure 4).

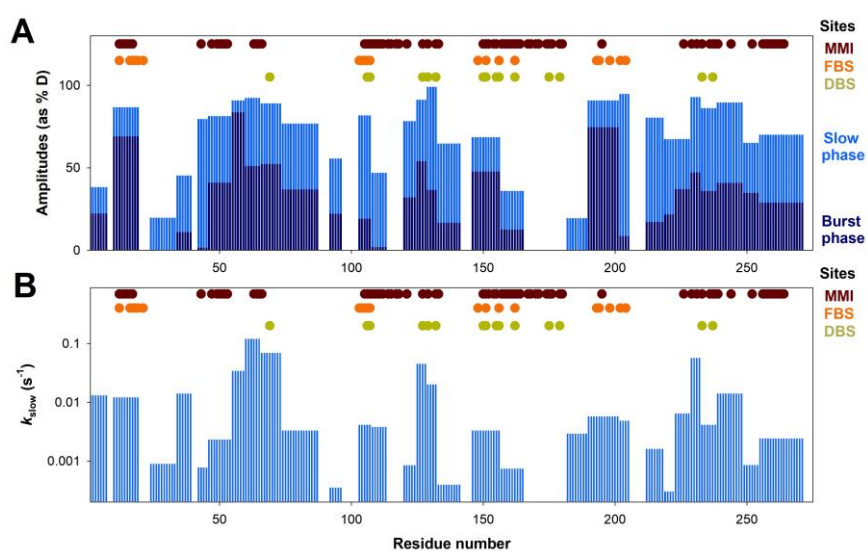

**Figure S10. Changes in HDX kinetics for 39 peptides of NQO1 upon binding FAD and dicoumarol as changes in %D<sub>av</sub> ( $\Delta\%D_{av}$ ). A)  $\Delta\%D_{av}$  for peptides upon binding FAD (NQO1<sub>holo</sub>) and dicoumarol (NQO1<sub>dic</sub>) using of NQO1<sub>apo</sub> as a reference (see Figure 7 for details). B) Representation of ( $\Delta\%D_{av}$ ) onto the structure of NQO1 (using PDB code 2F10). The upper row shows the results for  $\Delta\%D_{av}$  for NQO1<sub>holo</sub> and lower row represents NQO1<sub>dic</sub>. Different panels in each row show results for residues involved in the FBS, DBS or MMI. Note that this analysis for 39 experimental peptides (Table S2) shows little differences with those data carried out with NQO1 segments (Table S1 and Figure 7).**

Deleted: the 105 segments

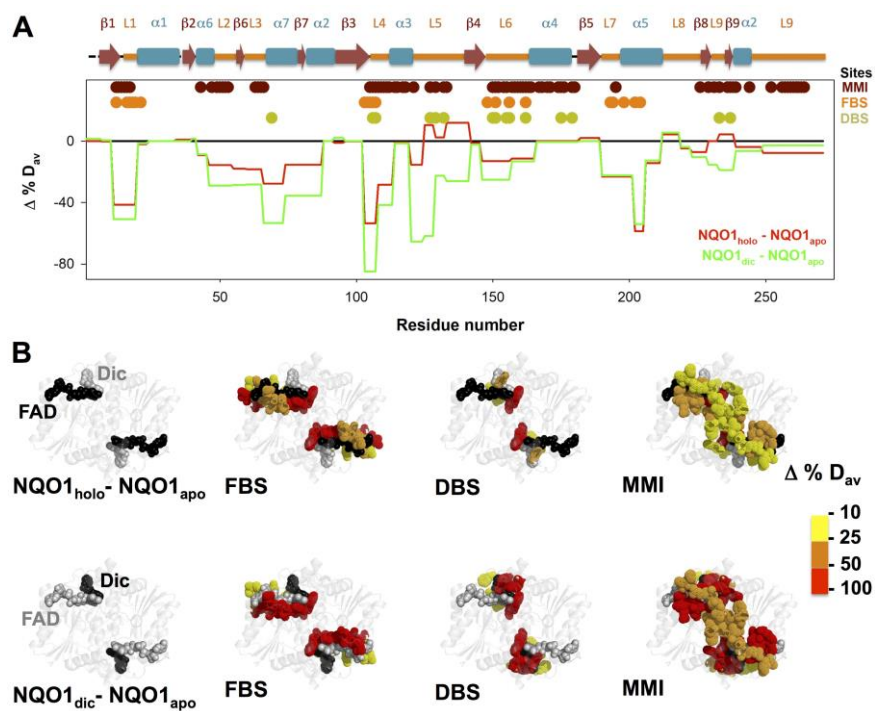

**Figure S11 (three pages). HDX kinetics for all peptides detected in HDXMS experiments.** Each peptide is represented by one deuterium uptake plot where number of uptaken deuterons is plotted as a function of time. Black stands for NQO1<sub>apo</sub>, red for NQO1<sub>holo</sub> and green for NQO1<sub>dic</sub>. Times points followed during experiment were 10 s, 30 s, 2 min, 5 min, 20 min, 1 h and 3 h. Labeling and analysis at 10 s, 5 min and 3 h was replicated and the data are shown as average values with standard deviation (error bars at these points). Peptide limits are shown at the top of each graph together with the range or charge states that were detected for the peptide.

Deleted: -

Deleted: retained

Deleted: s

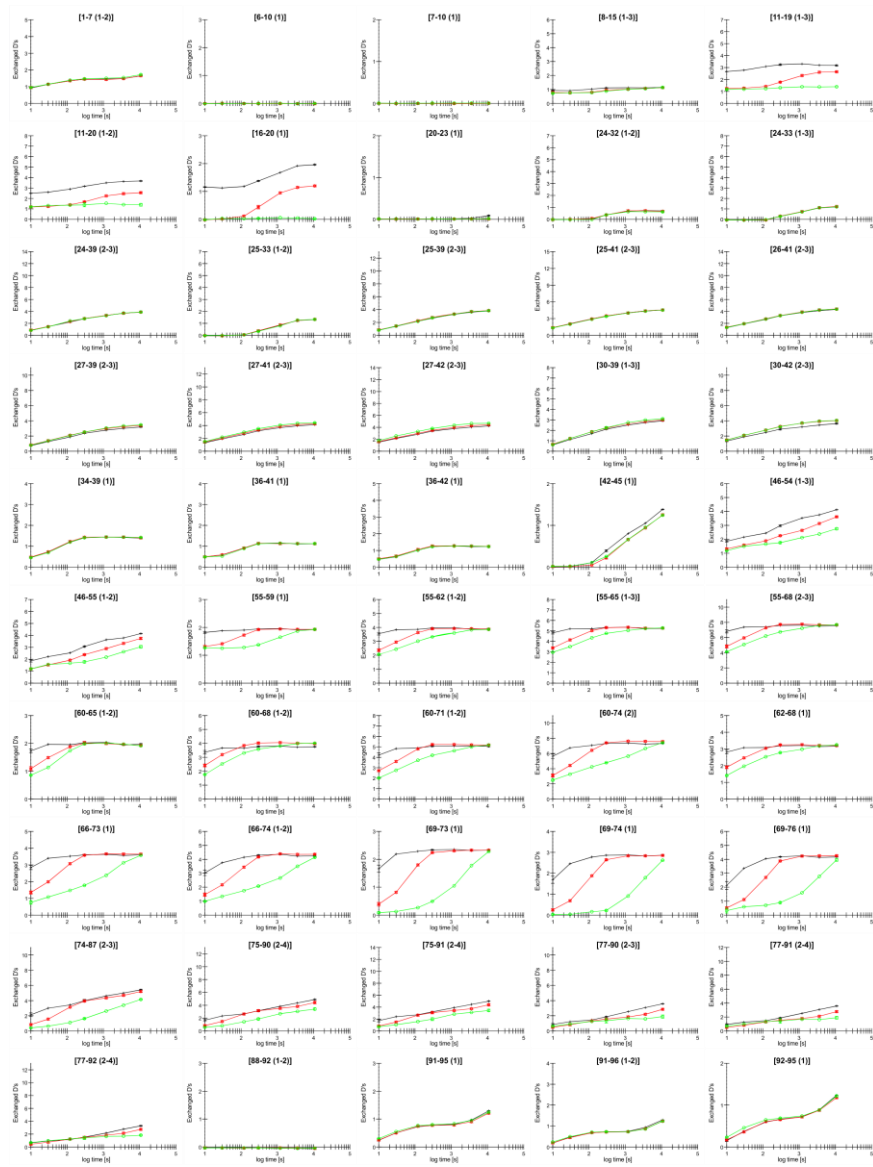



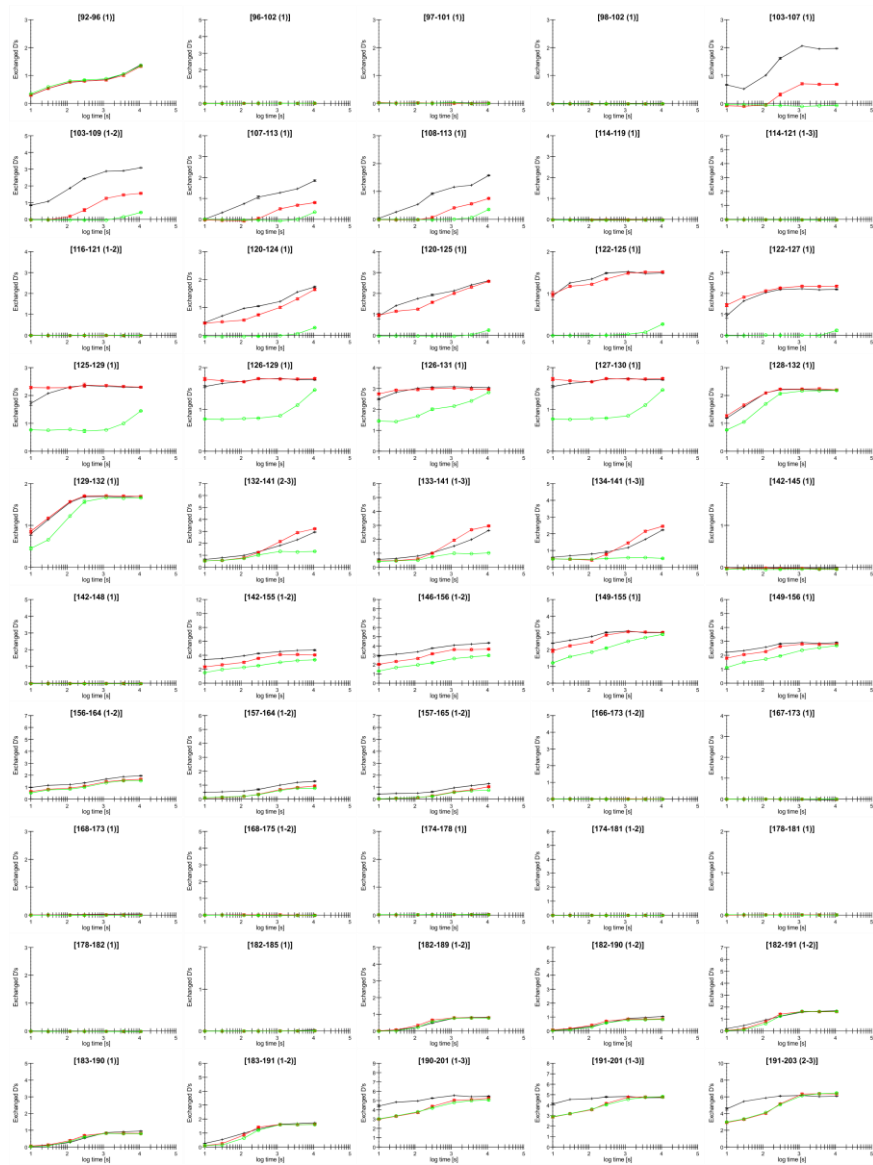

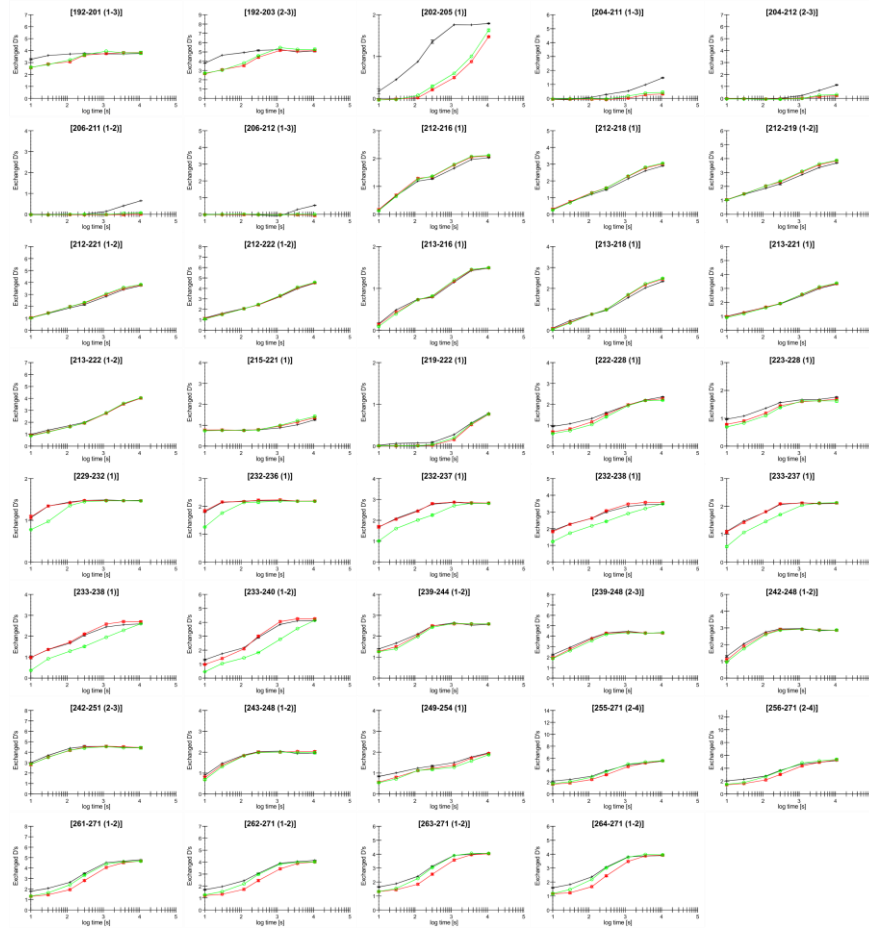

**Table S1. Kinetic parameters for fitting of HDX kinetics to a three-parameter exponential function for NQO1 segments. *SLNE***  
*indicates slow, little or no exchange.*

| Segment | NQO1 protein         | A <sub>burst</sub> (%D) | A <sub>slow</sub> (%D) | k <sub>slow</sub> (s <sup>-1</sup> ) | R <sup>2</sup> |
|---------|----------------------|-------------------------|------------------------|--------------------------------------|----------------|
| 1-5     | NQO1 <sub>apo</sub>  | 22.3±2.7                | 15.8±2.8               | 1.2±0.6 ·10 <sup>-2</sup>            | 0.914          |
|         | NQO1 <sub>holo</sub> | 23.0±2.8                | 15.0±2.8               | 1.2±0.6 ·10 <sup>-2</sup>            | 0.898          |
|         | NQO1 <sub>dic</sub>  | 23.5±2.6                | 16.2±2.7               | 1.0±0.5 ·10 <sup>-2</sup>            | 0.912          |
| 6       | NQO1 <sub>apo</sub>  | 8.8±1.3                 | 7.0±1.3                | 1.5±0.8 ·10 <sup>-2</sup>            | 0.916          |
|         | NQO1 <sub>holo</sub> | 9.6±1.2                 | 6.3±1.2                | 1.2±0.7 ·10 <sup>-2</sup>            | 0.893          |
|         | NQO1 <sub>dic</sub>  | 9.5±1.2                 | 7.0±1.2                | 1.1±0.5 ·10 <sup>-2</sup>            | 0.912          |
| 7       | NQO1 <sub>apo</sub>  | 5.2±0.7                 | 4.0±0.7                | 1.4±0.7 ·10 <sup>-2</sup>            | 0.915          |
|         | NQO1 <sub>holo</sub> | 5.5±0.7                 | 3.7±0.7                | 1.2±0.7 ·10 <sup>-2</sup>            | 0.893          |
|         | NQO1 <sub>dic</sub>  | 5.6±0.6                 | 4.1±0.6                | 1.0±0.4 ·10 <sup>-2</sup>            | 0.921          |
| 8-10    | NQO1 <sub>apo</sub>  | 6.1±0.1                 | 1.7±0.1                | 7.7±1.9 ·10 <sup>-3</sup>            | 0.973          |
|         | NQO1 <sub>holo</sub> | 5.3±0.2                 | 2.3±0.2                | 1.9±0.7 ·10 <sup>-3</sup>            | 0.957          |
|         | NQO1 <sub>dic</sub>  | 5.0±0.2                 | 2.7±0.3                | 1.6±0.5 ·10 <sup>-3</sup>            | 0.966          |
| 11-15   | NQO1 <sub>apo</sub>  | 51.0±0.3                | 15.9±0.4               | 6.0±0.4 ·10 <sup>-3</sup>            | 0.998          |
|         | NQO1 <sub>holo</sub> | 28.1±0.7                | 25.5±1.0               | 1.5±0.2 ·10 <sup>-3</sup>            | 0.994          |
|         | NQO1 <sub>dic</sub>  | 27.5±0.4                | 7.6±0.5                | 2.7±0.6 ·10 <sup>-3</sup>            | 0.983          |
| 16-19   | NQO1 <sub>apo</sub>  | 57.4±1.0                | 26.0±1.3               | 1.9±0.3 ·10 <sup>-3</sup>            | 0.990          |
|         | NQO1 <sub>holo</sub> | 14.6±0.8                | 42.8±1.1               | 1.5±0.1 ·10 <sup>-3</sup>            | 0.997          |
|         | NQO1 <sub>dic</sub>  | 15.4±0.7                | 3.6±0.8                | 5.2±3.2 ·10 <sup>-3</sup>            | 0.845          |
| 20      | NQO1 <sub>apo</sub>  | 28.7±0.6                | 18.5±0.9               | 1.0±0.2 ·10 <sup>-3</sup>            | 0.990          |
|         | NQO1 <sub>holo</sub> | 4.5±0.5                 | 24.5±0.6               | 1.5±0.1 ·10 <sup>-3</sup>            | 0.997          |
|         | NQO1 <sub>dic</sub>  | 5.2±0.6                 | 1.7±0.6                | 1.0±1.1 ·10 <sup>-2</sup>            | 0.695          |
| 21-23   | NQO1 <sub>apo</sub>  | SLNE                    |                        |                                      |                |
|         | NQO1 <sub>holo</sub> | SNLE                    |                        |                                      |                |
|         | NQO1 <sub>dic</sub>  | SNLE                    |                        |                                      |                |
| 24      | NQO1 <sub>apo</sub>  | 1.7±0.7                 | 17.0±0.8               | 1.7±0.3 ·10 <sup>-3</sup>            | 0.990          |

|       |                      |           |          |                            |       |
|-------|----------------------|-----------|----------|----------------------------|-------|
|       | NQO1 <sub>holo</sub> | 1.8±0.6   | 16.9±0.8 | 1.8±0.3 · 10 <sup>-3</sup> | 0.992 |
|       | NQO1 <sub>dic</sub>  | 1.7±0.7   | 16.4±0.8 | 1.8±0.3 · 10 <sup>-3</sup> | 0.989 |
| 25    | NQO1 <sub>apo</sub>  | 3.7±1.0   | 19.5±1.3 | 1.9±0.4 · 10 <sup>-3</sup> | 0.983 |
|       | NQO1 <sub>holo</sub> | 3.7±1.0   | 19.5±1.3 | 1.9±0.4 · 10 <sup>-3</sup> | 0.984 |
| 26    | NQO1 <sub>dic</sub>  | 3.8±1.0   | 19.2±1.3 | 1.8±0.4 · 10 <sup>-3</sup> | 0.982 |
|       | NQO1 <sub>apo</sub>  | 4.6±1.2   | 20.0±1.5 | 2.2±0.5 · 10 <sup>-3</sup> | 0.979 |
|       | NQO1 <sub>holo</sub> | 4.7±1.2   | 20.1±1.4 | 2.2±0.5 · 10 <sup>-3</sup> | 0.980 |
| 27-29 | NQO1 <sub>dic</sub>  | 4.7±1.2   | 19.8±1.5 | 2.1±0.5 · 10 <sup>-3</sup> | 0.977 |
|       | NQO1 <sub>apo</sub>  | 6.9±1.5   | 21.2±1.8 | 2.9±0.5 · 10 <sup>-3</sup> | 0.974 |
|       | NQO1 <sub>holo</sub> | 7.3±1.5   | 21.5±1.8 | 3.0±0.7 · 10 <sup>-3</sup> | 0.975 |
| 30-32 | NQO1 <sub>dic</sub>  | 7.4±1.5   | 21.6±1.9 | 2.9±0.7 · 10 <sup>-3</sup> | 0.973 |
|       | NQO1 <sub>apo</sub>  | 8.3±1.7   | 23.1±2.1 | 3.4±0.9 · 10 <sup>-3</sup> | 0.970 |
|       | NQO1 <sub>holo</sub> | 9.0±1.8   | 23.7±2.1 | 3.5±0.9 · 10 <sup>-3</sup> | 0.972 |
| 33    | NQO1 <sub>dic</sub>  | 9.1±1.8   | 24.1±2.2 | 3.5±0.9 · 10 <sup>-3</sup> | 0.971 |
|       | NQO1 <sub>apo</sub>  | 9.5±2.0   | 24.4±2.4 | 3.5±1.0 · 10 <sup>-3</sup> | 0.965 |
|       | NQO1 <sub>holo</sub> | 10.3±2.1  | 25.7±2.5 | 3.5±1.0 · 10 <sup>-3</sup> | 0.964 |
| 34-35 | NQO1 <sub>dic</sub>  | 10.4±2.1  | 25.7±2.3 | 3.5±1.0 · 10 <sup>-3</sup> | 0.963 |
|       | NQO1 <sub>apo</sub>  | 12.3±2.1  | 27.8±2.3 | 6.4±1.5 · 10 <sup>-3</sup> | 0.975 |
|       | NQO1 <sub>holo</sub> | 13.0±2.1  | 28.6±2.4 | 6.7±1.5 · 10 <sup>-3</sup> | 0.976 |
| 36-39 | NQO1 <sub>dic</sub>  | 12.9±2.2  | 29.4±2.5 | 6.4±1.5 · 10 <sup>-3</sup> | 0.974 |
|       | NQO1 <sub>apo</sub>  | 12.5±1.5  | 27.4±1.6 | 7.5±1.2 · 10 <sup>-3</sup> | 0.988 |
|       | NQO1 <sub>holo</sub> | 13.1±1.5  | 27.9±1.7 | 7.9±1.3 · 10 <sup>-3</sup> | 0.987 |
| 40-41 | NQO1 <sub>dic</sub>  | 12.9±1.6  | 28.6±1.7 | 7.3±1.2 · 10 <sup>-3</sup> | 0.988 |
|       | NQO1 <sub>apo</sub>  | 12.6 ±1.4 | 26.7±1.5 | 8.3±1.3 · 10 <sup>-3</sup> | 0.988 |
|       | NQO1 <sub>holo</sub> | 13.3±1.5  | 27.1±1.6 | 8.4±1.4 · 10 <sup>-3</sup> | 0.988 |
| 42    | NQO1 <sub>dic</sub>  | 13.3±1.4  | 27.7±1.5 | 7.9±1.2 · 10 <sup>-3</sup> | 0.989 |
|       | NQO1 <sub>apo</sub>  | 9.5±3.4   | 45.7±4.6 | 1.4±0.5 · 10 <sup>-3</sup> | 0.961 |
|       | NQO1 <sub>holo</sub> | 10.8±2.6  | 43.3±3.8 | 1.0±0.3 · 10 <sup>-3</sup> | 0.971 |
|       | NQO1 <sub>dic</sub>  | 11.3±2.7  | 42.9±3.9 | 1.1±0.3 · 10 <sup>-3</sup> | 0.969 |

|       |                      |          |          |                          |       |
|-------|----------------------|----------|----------|--------------------------|-------|
| 43-45 | NQ01 <sub>apo</sub>  | 1.6±3.6  | 77.8±6.7 | 7.7±1.8·10 <sup>-4</sup> | 0.987 |
|       | NQ01 <sub>holo</sub> | 0.6±2.7  | 74.4±4.7 | 5.4±1.1·10 <sup>-4</sup> | 0.987 |
|       | NQ01 <sub>dic</sub>  | 2.0±2.3  | 72.2±4.2 | 5.7±1.0·10 <sup>-4</sup> | 0.988 |
| 46-54 | NQ01 <sub>apo</sub>  | 40.4±3.1 | 39.9±3.8 | 2.5±0.8·10 <sup>-3</sup> | 0.966 |
|       | NQ01 <sub>holo</sub> | 31.1±3.6 | 40.2±5.1 | 1.1±0.5·10 <sup>-3</sup> | 0.940 |
|       | NQ01 <sub>dic</sub>  | 30.0±2.1 | 28.4±3.9 | 5.4±2.3·10 <sup>-4</sup> | 0.939 |
| 55    | NQ01 <sub>apo</sub>  | 75.9±1.5 | 11.6±1.7 | 6.7±2.7·10 <sup>-3</sup> | 0.930 |
|       | NQ01 <sub>holo</sub> | 50.0±1.7 | 35.7±1.8 | 1.0±0.1·10 <sup>-2</sup> | 0.992 |
|       | NQ01 <sub>dic</sub>  | 50.8±2.7 | 31.0±3.4 | 2.1±0.8·10 <sup>-3</sup> | 0.954 |
| 56-59 | NQ01 <sub>apo</sub>  | 76.3±4.9 | 13.1±4.8 | 6.5±3.1·10 <sup>-2</sup> | 0.898 |
|       | NQ01 <sub>holo</sub> | 53.8±1.2 | 36.1±1.2 | 1.4±0.1·10 <sup>-2</sup> | 0.997 |
|       | NQ01 <sub>dic</sub>  | 54.5±2.7 | 32.1±3.2 | 2.8±0.9·10 <sup>-3</sup> | 0.963 |
| 60-61 | NQ01 <sub>apo</sub>  | 65.2±8.8 | 24.9±8.7 | 8.1±3.2·10 <sup>-2</sup> | 0.938 |
|       | NQ01 <sub>holo</sub> | 44.0±2.8 | 47.7±2.7 | 2.2±0.3·10 <sup>-2</sup> | 0.993 |
|       | NQ01 <sub>dic</sub>  | 40.9±3.6 | 47.1±3.8 | 8.7±2.0·10 <sup>-3</sup> | 0.978 |
| 62    | NQ01 <sub>apo</sub>  | 66.0±8.6 | 24.2±8.5 | 8.0±3.2·10 <sup>-2</sup> | 0.938 |
|       | NQ01 <sub>holo</sub> | 44.4±2.8 | 47.5±2.8 | 2.2±0.3·10 <sup>-2</sup> | 0.993 |
|       | NQ01 <sub>dic</sub>  | 40.9±3.9 | 47.3±4.1 | 8.7±2.1·10 <sup>-3</sup> | 0.974 |
| 63-65 | NQ01 <sub>apo</sub>  | 65.2±8.9 | 25.4±8.8 | 8.0±3.2·10 <sup>-2</sup> | 0.938 |
|       | NQ01 <sub>holo</sub> | 43.9±2.9 | 48.8±2.9 | 2.2±0.3·10 <sup>-2</sup> | 0.993 |
|       | NQ01 <sub>dic</sub>  | 39.8±4.0 | 49.1±4.2 | 9.2±2.2·10 <sup>-3</sup> | 0.975 |
| 66-68 | NQ01 <sub>apo</sub>  | 61.8±5.5 | 27.9±5.5 | 6.2±1.6·10 <sup>-2</sup> | 0.966 |
|       | NQ01 <sub>holo</sub> | 39.5±2.4 | 53.0±2.4 | 1.6±0.2·10 <sup>-2</sup> | 0.995 |
|       | NQ01 <sub>dic</sub>  | 36.6±5.9 | 47.6±6.9 | 4.0±1.7·10 <sup>-3</sup> | 0.926 |
| 69-71 | NQ01 <sub>apo</sub>  | 39.5±4.6 | 46.4±4.6 | 5.8±0.8·10 <sup>-2</sup> | 0.991 |
|       | NQ01 <sub>holo</sub> | 15.7±1.0 | 71.3±1.0 | 1.1±0.1·10 <sup>-2</sup> | 0.999 |
|       | NQ01 <sub>dic</sub>  | 18.0±2.5 | 64.7±4.9 | 4.7±1.0·10 <sup>-4</sup> | 0.982 |
| 72-73 | NQ01 <sub>apo</sub>  | 37.2±4.6 | 48.2±4.5 | 5.8±0.7·10 <sup>-2</sup> | 0.991 |
|       | NQ01 <sub>holo</sub> | 11.0±1.5 | 75.1±1.5 | 1.1±0.1·10 <sup>-2</sup> | 0.998 |

|        |                      |          |           |                          |       |
|--------|----------------------|----------|-----------|--------------------------|-------|
|        | NQO1 <sub>dic</sub>  | 14.2±2.2 | 68.1±4.5  | 4.3±0.8·10 <sup>-4</sup> | 0.968 |
| 74     | NQO1 <sub>apo</sub>  | 33.1±6.7 | 46.9±6.7  | 4.3±1.0·10 <sup>-2</sup> | 0.975 |
|        | NQO1 <sub>holo</sub> | 11.5±1.2 | 69.9±1.3  | 9.1±0.5·10 <sup>-3</sup> | 0.999 |
|        | NQO1 <sub>dic</sub>  | 14.5±2.0 | 61.5±4.1  | 4.0±0.8·10 <sup>-4</sup> | 0.986 |
| 75-76  | NQO1 <sub>apo</sub>  | 30.2±4.3 | 30.3±4.8  | 5.9±2.6·10 <sup>-3</sup> | 0.914 |
|        | NQO1 <sub>holo</sub> | 7.2±3.0  | 50.4±3.2  | 7.4±1.3·10 <sup>-3</sup> | 0.985 |
|        | NQO1 <sub>dic</sub>  | 9.9±2.0  | 40.7±3.7  | 5.4±1.5·10 <sup>-4</sup> | 0.975 |
| 77-87  | NQO1 <sub>apo</sub>  | 22.2±2.6 | 31.1±3.7  | 1.2±0.5·10 <sup>-3</sup> | 0.946 |
|        | NQO1 <sub>holo</sub> | 9.0±4.4  | 33.4±5.0  | 5.2±2.2·10 <sup>-3</sup> | 0.922 |
|        | NQO1 <sub>dic</sub>  | 9.8±2.1  | 23.5±2.7  | 2.0±0.8·10 <sup>-3</sup> | 0.951 |
| 88-90  | NQO1 <sub>apo</sub>  | 10.9±1.5 | 18.7±2.3  | 1.0±0.4·10 <sup>-3</sup> | 0.946 |
|        | NQO1 <sub>holo</sub> | 5.0±2.6  | 17.2±3.0  | 4.6±2.3·10 <sup>-3</sup> | 0.894 |
|        | NQO1 <sub>dic</sub>  | 5.4±1.2  | 11.9±1.4  | 3.5±1.3·10 <sup>-3</sup> | 0.948 |
| 91     | NQO1 <sub>apo</sub>  | 13.5±2.7 | 21.2±5.3  | 4.9±3.6·10 <sup>-4</sup> | 0.831 |
|        | NQO1 <sub>holo</sub> | 6.6±4.5  | 19.2±5.0  | 6.3±4.5·10 <sup>-3</sup> | 0.803 |
|        | NQO1 <sub>dic</sub>  | 7.9±3.8  | 16.6±4.3  | 6.0±4.3·10 <sup>-3</sup> | 0.805 |
| 92     | NQO1 <sub>apo</sub>  | 17.3±3.9 | 30.0±8.8  | 3.6±3.0·10 <sup>-4</sup> | 0.803 |
|        | NQO1 <sub>holo</sub> | 17.4±4.0 | 27.0±8.6  | 3.8±3.5·10 <sup>-4</sup> | 0.769 |
|        | NQO1 <sub>dic</sub>  | 19.2±3.8 | 26.1±8.3  | 3.3±3.1·10 <sup>-4</sup> | 0.763 |
| 93-95  | NQO1 <sub>apo</sub>  | 22.0±5.0 | 37.8±11.7 | 3.4±2.9·10 <sup>-4</sup> | 0.791 |
|        | NQO1 <sub>holo</sub> | 22.2±5.0 | 34.2±11.1 | 3.6±3.4·10 <sup>-4</sup> | 0.764 |
|        | NQO1 <sub>dic</sub>  | 24.5±4.8 | 34.0±11.7 | 3.2±3.0·10 <sup>-4</sup> | 0.764 |
| 96     | NQO1 <sub>apo</sub>  | 14.0±2.8 | 22.0±6.6  | 3.2±2.7·10 <sup>-4</sup> | 0.803 |
|        | NQO1 <sub>holo</sub> | 14.2±2.8 | 20.4±7.1  | 3.0±2.8·10 <sup>-4</sup> | 0.772 |
|        | NQO1 <sub>dic</sub>  | 15.3±2.7 | 19.9±7.1  | 2.9±2.8·10 <sup>-4</sup> | 0.770 |
| 97     | NQO1 <sub>apo</sub>  |          |           | SLNE                     |       |
|        | NQO1 <sub>holo</sub> |          |           | SLNE                     |       |
|        | NQO1 <sub>dic</sub>  |          |           | SLNE                     |       |
| 98-101 | NQO1 <sub>apo</sub>  |          |           | SLNE                     |       |

|         |                      |          |          |                          |       |
|---------|----------------------|----------|----------|--------------------------|-------|
|         | NQO1 <sub>holo</sub> | SLNE     |          |                          |       |
|         | NQO1 <sub>dic</sub>  | SLNE     |          |                          |       |
| 102     | NQO1 <sub>apo</sub>  | SLNE     |          |                          |       |
|         | NQO1 <sub>holo</sub> | SLNE     |          |                          |       |
|         | NQO1 <sub>dic</sub>  | SLNE     |          |                          |       |
| 103-106 | NQO1 <sub>apo</sub>  | 18.9±2.0 | 58.3±2.3 | 4.5±0.5·10 <sup>-3</sup> | 0.994 |
|         | NQO1 <sub>holo</sub> | -3.3±1.1 | 35.0±1.4 | 2.0±0.3·10 <sup>-3</sup> | 0.994 |
|         | NQO1 <sub>dic</sub>  | SLNE     |          |                          |       |
| 107     | NQO1 <sub>apo</sub>  | 13.8±2.0 | 54.7±2.3 | 4.4±0.5·10 <sup>-3</sup> | 0.994 |
|         | NQO1 <sub>holo</sub> | -2.6±0.9 | 31.8±1.2 | 1.6±0.2·10 <sup>-3</sup> | 0.995 |
|         | NQO1 <sub>dic</sub>  | SLNE     |          |                          |       |
| 108-109 | NQO1 <sub>apo</sub>  | 12.2±3.9 | 42.8±4.6 | 3.6±1.2·10 <sup>-3</sup> | 0.958 |
|         | NQO1 <sub>holo</sub> | -1.4±0.9 | 29.3±1.4 | 9.7±1.5·10 <sup>-4</sup> | 0.991 |
|         | NQO1 <sub>dic</sub>  | SLNE     |          |                          |       |
| 110-113 | NQO1 <sub>apo</sub>  | 1.8±5.3  | 45.4±6.2 | 4.1±1.6·10 <sup>-3</sup> | 0.934 |
|         | NQO1 <sub>holo</sub> | -1.1±1.1 | 25.9±1.9 | 6.4±1.5·10 <sup>-3</sup> | 0.980 |
|         | NQO1 <sub>dic</sub>  | SLNE     |          |                          |       |
| 114-115 | NQO1 <sub>apo</sub>  | SLNE     |          |                          |       |
|         | NQO1 <sub>holo</sub> | SLNE     |          |                          |       |
|         | NQO1 <sub>dic</sub>  | SLNE     |          |                          |       |
| 116-119 | NQO1 <sub>apo</sub>  | SLNE     |          |                          |       |
|         | NQO1 <sub>holo</sub> | SLNE     |          |                          |       |
|         | NQO1 <sub>dic</sub>  | SLNE     |          |                          |       |
| 120-121 | NQO1 <sub>apo</sub>  | 17.2±3.9 | 24.4±4.7 | 3.2±1.9·10 <sup>-3</sup> | 0.876 |
|         | NQO1 <sub>holo</sub> | 16.1±1.4 | 27.2±2.5 | 6.3±1.8·10 <sup>-4</sup> | 0.972 |
|         | NQO1 <sub>dic</sub>  | SLNE     |          |                          |       |
| 122-124 | NQO1 <sub>apo</sub>  | 41.2±6.6 | 43.1±7.0 | 9.8±4.5·10 <sup>-3</sup> | 0.919 |
|         | NQO1 <sub>holo</sub> | 49.3±3.5 | 36.4±4.4 | 2.2±0.9·10 <sup>-3</sup> | 0.946 |
|         | NQO1 <sub>dic</sub>  | SLNE     |          |                          |       |

|         |                      |          |          |                          |       |
|---------|----------------------|----------|----------|--------------------------|-------|
| 125     | NQO1 <sub>apo</sub>  | 38.7±8.9 | 50.2±8.8 | 3.2±1.1·10 <sup>-2</sup> | 0.958 |
|         | NQO1 <sub>holo</sub> | 65.2±2.4 | 26.7±2.8 | 4.1±1.2·10 <sup>-3</sup> | 0.961 |
|         | NQO1 <sub>dic</sub>  | SLNE     |          |                          |       |
| 126     | NQO1 <sub>apo</sub>  | 57.6±3.4 | 35.3±3.4 | 4.0±0.7·10 <sup>-2</sup> | 0.988 |
|         | NQO1 <sub>holo</sub> | 84.1±1.0 | 10.3±1.1 | 9.6±2.8·10 <sup>-3</sup> | 0.965 |
|         | NQO1 <sub>dic</sub>  | 31.4±0.7 | 41.3±7.3 | 1.6±0.4·10 <sup>-4</sup> | 0.991 |
| 127     | NQO1 <sub>apo</sub>  | 63.8±3.3 | 29.4±3.3 | 3.8±0.7·10 <sup>-2</sup> | 0.984 |
|         | NQO1 <sub>holo</sub> | 86.7±0.7 | 8.0±0.8  | 7.4±2.0·10 <sup>-2</sup> | 0.967 |
|         | NQO1 <sub>dic</sub>  | 33.9±0.5 | 45.3±6.0 | 1.1±0.3·10 <sup>-4</sup> | 0.995 |
| 128     | NQO1 <sub>apo</sub>  | 67.7±2.3 | 26.0±2.3 | 3.0±0.5·10 <sup>-2</sup> | 0.988 |
|         | NQO1 <sub>holo</sub> | 84.3±0.8 | 10.0±0.8 | 1.0±0.2·10 <sup>-2</sup> | 0.977 |
|         | NQO1 <sub>dic</sub>  | 43.4±2.4 | 37.2±6.5 | 2.8±1.4·10 <sup>-4</sup> | 0.934 |
| 129     | NQO1 <sub>apo</sub>  | 62.1±2.3 | 32.6±2.3 | 2.5±0.4·10 <sup>-2</sup> | 0.992 |
|         | NQO1 <sub>holo</sub> | 76.5±1.2 | 18.8±1.2 | 1.4±0.2·10 <sup>-2</sup> | 0.989 |
|         | NQO1 <sub>dic</sub>  | 36.6±5.8 | 36.2±6.9 | 3.5±2.0·10 <sup>-3</sup> | 0.879 |
| 130     | NQO1 <sub>apo</sub>  | 57.5±2.2 | 38.2±2.2 | 2.3±0.3·10 <sup>-2</sup> | 0.994 |
|         | NQO1 <sub>holo</sub> | 66.9±1.8 | 29.0±1.8 | 1.8±0.3·10 <sup>-2</sup> | 0.991 |
|         | NQO1 <sub>dic</sub>  | 34.2±4.7 | 47.9±5.3 | 5.7±1.7·10 <sup>-3</sup> | 0.957 |
| 131     | NQO1 <sub>apo</sub>  | 46.8±2.4 | 49.4±2.4 | 2.3±0.3·10 <sup>-2</sup> | 0.996 |
|         | NQO1 <sub>holo</sub> | 53.5±2.6 | 42.6±2.6 | 2.2±0.3·10 <sup>-2</sup> | 0.993 |
|         | NQO1 <sub>dic</sub>  | 29.2±2.2 | 60.7±2.3 | 7.8±0.8·10 <sup>-3</sup> | 0.995 |
| 132     | NQO1 <sub>apo</sub>  | 37.4±4.1 | 51.0±4.2 | 1.5±0.3·10 <sup>-2</sup> | 0.982 |
|         | NQO1 <sub>holo</sub> | 42.2±3.8 | 48.5±3.9 | 1.1±0.3·10 <sup>-2</sup> | 0.979 |
|         | NQO1 <sub>dic</sub>  | 21.3±0.6 | 62.2±0.6 | 8.9±0.3·10 <sup>-3</sup> | 0.999 |
| 133     | NQO1 <sub>apo</sub>  | 18.0±2.2 | 48.0±4.5 | 4.3±1.2·10 <sup>-4</sup> | 0.973 |
|         | NQO1 <sub>holo</sub> | 11.6±1.1 | 61.4±1.7 | 7.9±0.7·10 <sup>-4</sup> | 0.997 |
|         | NQO1 <sub>dic</sub>  | 10.5±0.6 | 17.2±0.8 | 3.0±0.4·10 <sup>-3</sup> | 0.994 |
| 134-141 | NQO1 <sub>apo</sub>  | 18.6±1.8 | 46.7±3.9 | 3.7±0.9·10 <sup>-4</sup> | 0.980 |
|         | NQO1 <sub>holo</sub> | 11.8±1.0 | 59.6±1.7 | 7.0±0.6·10 <sup>-4</sup> | 0.997 |



|         |                      |          |          |                          |       |
|---------|----------------------|----------|----------|--------------------------|-------|
|         | NQO1 <sub>dic</sub>  | 11.6±0.5 | 11.7±0.6 | 2.9±0.5·10 <sup>-3</sup> | 0.991 |
| 142-145 | NQO1 <sub>apo</sub>  | 5.1±0.2  | 2.5±0.3  | 5.7±1.6·10 <sup>-3</sup> | 0.961 |
|         | NQO1 <sub>holo</sub> | 3.6±0.2  | 3.1±0.2  | 4.6±0.9·10 <sup>-3</sup> | 0.981 |
|         | NQO1 <sub>dic</sub>  | 2.6±0.3  | 2.7±0.4  | 3.4±1.4·10 <sup>-3</sup> | 0.934 |
| 146-148 | NQO1 <sub>apo</sub>  | 22.6±0.6 | 9.3±0.6  | 3.6±0.7·10 <sup>-3</sup> | 0.982 |
|         | NQO1 <sub>holo</sub> | 15.5±0.4 | 12.0±0.5 | 4.1±0.4·10 <sup>-3</sup> | 0.993 |
|         | NQO1 <sub>dic</sub>  | 10.8±1.0 | 10.6±1.2 | 2.8±1.0·10 <sup>-3</sup> | 0.952 |
| 149-155 | NQO1 <sub>apo</sub>  | 56.9±0.6 | 19.1±0.6 | 6.3±0.6·10 <sup>-3</sup> | 0.998 |
|         | NQO1 <sub>holo</sub> | 44.8±1.3 | 27.4±1.5 | 5.2±0.8·10 <sup>-3</sup> | 0.989 |
|         | NQO1 <sub>dic</sub>  | 31.5±3.1 | 31.5±3.7 | 2.7±1.0·10 <sup>-3</sup> | 0.948 |
| 156     | NQO1 <sub>apo</sub>  | 44.0±1.1 | 19.2±1.3 | 3.6±0.7·10 <sup>-3</sup> | 0.982 |
|         | NQO1 <sub>holo</sub> | 33.2±1.2 | 24.1±1.4 | 3.9±0.7·10 <sup>-3</sup> | 0.987 |
|         | NQO1 <sub>dic</sub>  | 24.5±2.3 | 26.5±2.8 | 2.3±0.8·10 <sup>-3</sup> | 0.959 |
| 157-164 | NQO1 <sub>apo</sub>  | 17.3±0.6 | 21.7±1.0 | 9.3±1.4·10 <sup>-4</sup> | 0.992 |
|         | NQO1 <sub>holo</sub> | 6.6±1.1  | 23.5±1.6 | 1.2±0.3·10 <sup>-3</sup> | 0.982 |
|         | NQO1 <sub>dic</sub>  | 5.9±0.7  | 20.5±1.0 | 1.4±0.2·10 <sup>-3</sup> | 0.991 |
| 165     | NQO1 <sub>apo</sub>  | 12.5±0.8 | 23.2±1.3 | 7.4±1.3·10 <sup>-4</sup> | 0.989 |
|         | NQO1 <sub>holo</sub> | 1.5±1.3  | 26.3±2.2 | 6.7±1.8·10 <sup>-4</sup> | 0.974 |
|         | NQO1 <sub>dic</sub>  | 0.8±0.4  | 20.0±0.5 | 1.2±0.1·10 <sup>-3</sup> | 0.998 |
| 166     | NQO1 <sub>apo</sub>  |          |          | SLNE                     |       |
|         | NQO1 <sub>holo</sub> |          |          | SLNE                     |       |
|         | NQO1 <sub>dic</sub>  |          |          | SLNE                     |       |
| 167     | NQO1 <sub>apo</sub>  |          |          | SLNE                     |       |
|         | NQO1 <sub>holo</sub> |          |          | SLNE                     |       |
|         | NQO1 <sub>dic</sub>  |          |          | SLNE                     |       |
| 168-173 | NQO1 <sub>apo</sub>  |          |          | SLNE                     |       |
|         | NQO1 <sub>holo</sub> |          |          | SLNE                     |       |
|         | NQO1 <sub>dic</sub>  |          |          | SLNE                     |       |
| 174-175 | NQO1 <sub>apo</sub>  |          |          | SLNE                     |       |

|         |                      |          |          |                            |       |
|---------|----------------------|----------|----------|----------------------------|-------|
|         | NQO1 <sub>holo</sub> |          |          | SLNE                       |       |
|         | NQO1 <sub>dic</sub>  |          |          | SLNE                       |       |
| 176-177 | NQO1 <sub>apo</sub>  |          |          | SLNE                       |       |
|         | NQO1 <sub>holo</sub> |          |          | SLNE                       |       |
| 178     | NQO1 <sub>dic</sub>  |          |          | SLNE                       |       |
|         | NQO1 <sub>apo</sub>  |          |          | SLNE                       |       |
|         | NQO1 <sub>holo</sub> |          |          | SLNE                       |       |
| 179-181 | NQO1 <sub>dic</sub>  |          |          | SLNE                       |       |
|         | NQO1 <sub>apo</sub>  |          |          | SLNE                       |       |
|         | NQO1 <sub>holo</sub> |          |          | SLNE                       |       |
| 182     | NQO1 <sub>dic</sub>  |          |          | SLNE                       |       |
|         | NQO1 <sub>apo</sub>  | 0.6±0.4  | 8.8±0.5  | 3.2±0.5 · 10 <sup>-3</sup> | 0.990 |
|         | NQO1 <sub>holo</sub> | -0.3±0.2 | 9.1±0.2  | 5.7±0.3 · 10 <sup>-3</sup> | 0.999 |
|         | NQO1 <sub>dic</sub>  | -0.5±0.2 | 9.1±0.2  | 4.2±0.3 · 10 <sup>-3</sup> | 0.998 |
| 183-185 | NQO1 <sub>apo</sub>  | 1.4±0.6  | 15.2±0.7 | 3.4±0.5 · 10 <sup>-3</sup> | 0.992 |
|         | NQO1 <sub>holo</sub> | -0.4±0.2 | 16.0±0.3 | 5.8±0.3 · 10 <sup>-3</sup> | 0.999 |
|         | NQO1 <sub>dic</sub>  | -0.7±0.3 | 16.0±0.3 | 4.4±0.2 · 10 <sup>-3</sup> | 0.999 |
| 186-189 | NQO1 <sub>apo</sub>  | 1.9±0.7  | 21.7±0.9 | 3.6±0.4 · 10 <sup>-3</sup> | 0.994 |
|         | NQO1 <sub>holo</sub> | -0.5±0.3 | 22.9±0.4 | 5.9±0.3 · 10 <sup>-3</sup> | 0.999 |
|         | NQO1 <sub>dic</sub>  | -0.9±0.7 | 22.9±0.5 | 4.4±0.2 · 10 <sup>-3</sup> | 0.998 |
| 190     | NQO1 <sub>apo</sub>  | 13.9±0.9 | 21.4±1.1 | 4.0±0.6 · 10 <sup>-3</sup> | 0.991 |
|         | NQO1 <sub>holo</sub> | 7.5±0.3  | 25.5±0.3 | 5.4±0.2 · 10 <sup>-3</sup> | 0.999 |
|         | NQO1 <sub>dic</sub>  | 7.5±0.2  | 24.9±0.2 | 4.3±0.1 · 10 <sup>-3</sup> | 0.999 |
| 191     | NQO1 <sub>apo</sub>  | 42.4±1.9 | 20.6±2.1 | 7.8±2.2 · 10 <sup>-3</sup> | 0.965 |
|         | NQO1 <sub>holo</sub> | 26.3±0.5 | 35.9±0.5 | 4.5±0.2 · 10 <sup>-3</sup> | 0.999 |
|         | NQO1 <sub>dic</sub>  | 27.0±0.8 | 34.5±0.9 | 3.8±0.3 · 10 <sup>-3</sup> | 0.997 |
| 192-201 | NQO1 <sub>apo</sub>  | 63.5±5.1 | 25.7±5.1 | 4.6±1.4 · 10 <sup>-2</sup> | 0.955 |
|         | NQO1 <sub>holo</sub> | 51.3±1.2 | 38.6±1.4 | 3.9±0.4 · 10 <sup>-3</sup> | 0.995 |
|         | NQO1 <sub>dic</sub>  | 52.1±1.0 | 37.9±1.2 | 4.1±0.4 · 10 <sup>-3</sup> | 0.997 |

|         |                      |          |          |                           |       |
|---------|----------------------|----------|----------|---------------------------|-------|
| 202-203 | NQO1 <sub>apo</sub>  | 32.4±3.0 | 60.3±3.4 | 5.7±0.9 ·10 <sup>-3</sup> | 0.988 |
|         | NQO1 <sub>holo</sub> | 21.4±3.4 | 59.5±6.4 | 5.2±1.7 ·10 <sup>-4</sup> | 0.962 |
|         | NQO1 <sub>dic</sub>  | 22.4±3.9 | 63.5±7.1 | 5.5±1.9 ·10 <sup>-4</sup> | 0.958 |
| 204-205 | NQO1 <sub>apo</sub>  | 5.3±3.3  | 53.5±4.0 | 3.4±0.8 ·10 <sup>-3</sup> | 0.979 |
|         | NQO1 <sub>holo</sub> | 0.4±0.9  | 46.1±2.6 | 2.5±0.4 ·10 <sup>-4</sup> | 0.994 |
|         | NQO1 <sub>dic</sub>  | 1.0±1.2  | 49.7±3.1 | 2.9±0.5 ·10 <sup>-4</sup> | 0.991 |
| 206-211 | NQO1 <sub>apo</sub>  | -0.2±0.2 | 26.9±0.6 | 2.2±0.1 ·10 <sup>-4</sup> | 0.999 |
|         | NQO1 <sub>holo</sub> | -0.1±0.2 | 3.3±0.6  | 2.3±1.0 ·10 <sup>-4</sup> | 0.955 |
|         | NQO1 <sub>dic</sub>  | -0.2±0.2 | 5.0±0.5  | 3.4±1.0 ·10 <sup>-4</sup> | 0.973 |
| 212     | NQO1 <sub>apo</sub>  | 18.3±4.3 | 44.8±6.0 | 1.2±0.6 ·10 <sup>-3</sup> | 0.933 |
|         | NQO1 <sub>holo</sub> | 16.0±4.8 | 43.6±5.8 | 2.4±1.1 ·10 <sup>-3</sup> | 0.935 |
|         | NQO1 <sub>dic</sub>  | 14.8±4.9 | 45.7±5.9 | 2.5±1.1 ·10 <sup>-3</sup> | 0.939 |
| 213-214 | NQO1 <sub>apo</sub>  | 22.6±5.4 | 57.5±7.3 | 1.4±0.6 ·10 <sup>-3</sup> | 0.939 |
|         | NQO1 <sub>holo</sub> | 21.2±5.7 | 60.5±7.4 | 1.7±0.7 ·10 <sup>-3</sup> | 0.944 |
|         | NQO1 <sub>dic</sub>  | 19.1±6.0 | 63±7.5   | 1.9±0.8 ·10 <sup>-3</sup> | 0.946 |
| 215-216 | NQO1 <sub>apo</sub>  | 24.2±4.9 | 53.5±6.8 | 1.3±0.6 ·10 <sup>-3</sup> | 0.940 |
|         | NQO1 <sub>holo</sub> | 23.2±5.1 | 56.6±6.8 | 1.5±0.6 ·10 <sup>-3</sup> | 0.946 |
|         | NQO1 <sub>dic</sub>  | 21.4±5.3 | 59.2±6.9 | 1.7±0.7 ·10 <sup>-3</sup> | 0.948 |
| 217-218 | NQO1 <sub>apo</sub>  | 25.2±3.5 | 49.0±5.3 | 9.6±3.4 ·10 <sup>-4</sup> | 0.957 |
|         | NQO1 <sub>holo</sub> | 24.7±3.6 | 52.2±5.2 | 1.1±0.4 ·10 <sup>-3</sup> | 0.962 |
|         | NQO1 <sub>dic</sub>  | 23.5±3.7 | 54.6±5.3 | 1.1±0.4 ·10 <sup>-3</sup> | 0.964 |
| 219     | NQO1 <sub>apo</sub>  | 22.9±2.1 | 42.6±3.8 | 5.6±1.6 ·10 <sup>-4</sup> | 0.973 |
|         | NQO1 <sub>holo</sub> | 22.2±2.0 | 44.6±3.6 | 5.6±1.4 ·10 <sup>-4</sup> | 0.978 |
|         | NQO1 <sub>dic</sub>  | 21.5±2.1 | 46.0±3.6 | 6.3±1.6 ·10 <sup>-4</sup> | 0.978 |
| 220-221 | NQO1 <sub>apo</sub>  | 21.2±1.7 | 41.4±3.3 | 4.9±1.2 ·10 <sup>-4</sup> | 0.979 |
|         | NQO1 <sub>holo</sub> | 20.1±4.5 | 43.5±2.9 | 4.9±1.0 ·10 <sup>-4</sup> | 0.985 |
|         | NQO1 <sub>dic</sub>  | 19.5±1.6 | 44.8±3.0 | 5.4±1.1 ·10 <sup>-4</sup> | 0.985 |
| 222     | NQO1 <sub>apo</sub>  | 17.9±1.8 | 43.3±3.4 | 5.4±1.3 ·10 <sup>-4</sup> | 0.980 |
|         | NQO1 <sub>holo</sub> | 14.7±1.7 | 45.6±3.2 | 5.4±1.1 ·10 <sup>-4</sup> | 0.984 |

|         |                      |          |          |                           |       |
|---------|----------------------|----------|----------|---------------------------|-------|
|         | NQO1 <sub>dic</sub>  | 13.6±1.7 | 46.2±2.9 | 6.1±1.2 ·10 <sup>-4</sup> | 0.986 |
| 223-228 | NQO1 <sub>apo</sub>  | 33.8±2.3 | 32.9±2.7 | 3.8±0.9 ·10 <sup>-3</sup> | 0.975 |
|         | NQO1 <sub>holo</sub> | 25.9±1.8 | 39.0±2.2 | 3.8±0.6 ·10 <sup>-3</sup> | 0.989 |
|         | NQO1 <sub>dic</sub>  | 23.0±1.3 | 41.1±1.5 | 3.4±0.4 ·10 <sup>-3</sup> | 0.995 |
| 229-231 | NQO1 <sub>apo</sub>  | 47.2±4.5 | 45.5±4.4 | 5.7±0.8 ·10 <sup>-2</sup> | 0.991 |
|         | NQO1 <sub>holo</sub> | 49.7±5.6 | 42.5±5.5 | 5.7±1.0 ·10 <sup>-2</sup> | 0.984 |
|         | NQO1 <sub>dic</sub>  | 41.2±0.6 | 51.0±0.6 | 1.7±0.4 ·10 <sup>-2</sup> | 0.999 |
| 232     | NQO1 <sub>apo</sub>  | 54.6±6.6 | 35.2±6.6 | 3.0±1.1 ·10 <sup>-2</sup> | 0.950 |
|         | NQO1 <sub>holo</sub> | 62.5±4.2 | 28.8±4.2 | 1.4±0.6 ·10 <sup>-2</sup> | 0.943 |
|         | NQO1 <sub>dic</sub>  | 40.5±5.1 | 47.5±5.2 | 1.2±0.4 ·10 <sup>-2</sup> | 0.964 |
| 233-236 | NQO1 <sub>apo</sub>  | 51.1±3.1 | 38.0±3.5 | 6.6±1.7 ·10 <sup>-3</sup> | 0.970 |
|         | NQO1 <sub>holo</sub> | 49.8±2.8 | 41.4±3.1 | 6.3±1.3 ·10 <sup>-3</sup> | 0.979 |
|         | NQO1 <sub>dic</sub>  | 33.4±6.3 | 51.5±7.2 | 4.8±1.9 ·10 <sup>-3</sup> | 0.995 |
| 237     | NQO1 <sub>apo</sub>  | 44.4±2.9 | 44.2±3.2 | 5.8±1.2 ·10 <sup>-3</sup> | 0.980 |
|         | NQO1 <sub>holo</sub> | 42.2±2.6 | 48.6±2.9 | 5.8±1.0 ·10 <sup>-3</sup> | 0.987 |
|         | NQO1 <sub>dic</sub>  | 28.4±6.2 | 55.7±7.3 | 3.6±1.4 ·10 <sup>-3</sup> | 0.938 |
| 238     | NQO1 <sub>apo</sub>  | 39.3±2.6 | 48.4±3.1 | 3.7±0.7 ·10 <sup>-3</sup> | 0.984 |
|         | NQO1 <sub>holo</sub> | 36.2±2.6 | 55.2±3.0 | 3.9±0.6 ·10 <sup>-3</sup> | 0.989 |
|         | NQO1 <sub>dic</sub>  | 27.2±6.0 | 55.6±7.8 | 1.7±0.8 ·10 <sup>-3</sup> | 0.927 |
| 239-240 | NQO1 <sub>apo</sub>  | 41.1±2.0 | 47.7±2.3 | 6.2±0.8 ·10 <sup>-3</sup> | 0.992 |
|         | NQO1 <sub>holo</sub> | 34.7±1.7 | 55.6±1.9 | 6.4±0.6 ·10 <sup>-3</sup> | 0.996 |
|         | NQO1 <sub>dic</sub>  | 31.8±3.6 | 53.4±4.2 | 5.0±1.0 ·10 <sup>-3</sup> | 0.978 |
| 241     | NQO1 <sub>apo</sub>  | 44.0±2.3 | 44.8±2.4 | 1.0±0.2 ·10 <sup>-2</sup> | 0.991 |
|         | NQO1 <sub>holo</sub> | 38.7±1.4 | 50.5±1.4 | 1.0±0.1 ·10 <sup>-2</sup> | 0.997 |
|         | NQO1 <sub>dic</sub>  | 38.1±0.7 | 51.1±0.8 | 8.4±0.4 ·10 <sup>-3</sup> | 0.999 |
| 242     | NQO1 <sub>apo</sub>  | 41.9±3.2 | 46.5±3.2 | 1.6±0.3 ·10 <sup>-2</sup> | 0.988 |
|         | NQO1 <sub>holo</sub> | 37.5±2.8 | 51.0±2.8 | 1.4±0.2 ·10 <sup>-2</sup> | 0.992 |
|         | NQO1 <sub>dic</sub>  | 36.7±2.1 | 51.6±2.2 | 1.2±0.1 ·10 <sup>-2</sup> | 0.995 |
| 243-244 | NQO1 <sub>apo</sub>  | 37.7±4.2 | 49.6±4.2 | 2.0±0.4 ·10 <sup>-2</sup> | 0.985 |

|         |                      |          |          |                           |       |
|---------|----------------------|----------|----------|---------------------------|-------|
|         | NQO1 <sub>holo</sub> | 34.1±3.6 | 53.7±3.6 | 1.6±0.3 ·10 <sup>-2</sup> | 0.989 |
|         | NQO1 <sub>dic</sub>  | 32.5±3.0 | 54.7±3.0 | 1.5±0.2 ·10 <sup>-2</sup> | 0.996 |
| 245-248 | NQO1 <sub>apo</sub>  | 31.1±4.9 | 55.8±4.8 | 2.8±0.5 ·10 <sup>-2</sup> | 0.988 |
|         | NQO1 <sub>holo</sub> | 26.7±4.9 | 59.5±4.8 | 2.4±0.4 ·10 <sup>-2</sup> | 0.988 |
|         | NQO1 <sub>dic</sub>  | 26.4±4.3 | 60.2±4.2 | 2.1±0.4 ·10 <sup>-2</sup> | 0.990 |
| 249-251 | NQO1 <sub>apo</sub>  | 41.2±4.1 | 28.8±4.5 | 6.4±2.8 ·10 <sup>-3</sup> | 0.917 |
|         | NQO1 <sub>holo</sub> | 34.5±4.8 | 34.4±5.4 | 6.1±2.7 ·10 <sup>-3</sup> | 0.916 |
|         | NQO1 <sub>dic</sub>  | 32.6±5.3 | 33.7±5.8 | 7.7±3.7 ·10 <sup>-3</sup> | 0.905 |
| 252-254 | NQO1 <sub>apo</sub>  | 34.8±3.1 | 30.2±4.9 | 8.5±4.5 ·10 <sup>-4</sup> | 0.910 |
|         | NQO1 <sub>holo</sub> | 27.7±4.4 | 35.7±6.7 | 9.0±5.6 ·10 <sup>-4</sup> | 0.882 |
|         | NQO1 <sub>dic</sub>  | 27.4±4.7 | 34.1±7.9 | 6.8±5.1 ·10 <sup>-4</sup> | 0.837 |
| 255     | NQO1 <sub>apo</sub>  | 28.9±1.8 | 41.0±2.2 | 2.4±0.4 ·10 <sup>-3</sup> | 0.989 |
|         | NQO1 <sub>holo</sub> | 22.5±1.8 | 48.3±2.4 | 1.6±0.3 ·10 <sup>-3</sup> | 0.990 |
|         | NQO1 <sub>dic</sub>  | 23.3±1.9 | 48.0±2.3 | 2.6±0.4 ·10 <sup>-3</sup> | 0.991 |
| 256-260 | NQO1 <sub>apo</sub>  | 29.2±1.7 | 42.1±2.1 | 2.4±0.4 ·10 <sup>-3</sup> | 0.991 |
|         | NQO1 <sub>holo</sub> | 21.9±1.9 | 50.3±2.5 | 1.6±0.3 ·10 <sup>-3</sup> | 0.990 |
|         | NQO1 <sub>dic</sub>  | 22.5±1.9 | 50.8±2.3 | 2.7±0.4 ·10 <sup>-3</sup> | 0.992 |
| 261     | NQO1 <sub>apo</sub>  | 29.3±1.4 | 45.0±1.7 | 2.7±0.3 ·10 <sup>-3</sup> | 0.994 |
|         | NQO1 <sub>holo</sub> | 21.6±1.7 | 52.2±2.2 | 1.7±0.2 ·10 <sup>-3</sup> | 0.993 |
|         | NQO1 <sub>dic</sub>  | 22.0±1.6 | 52.6±1.9 | 3.0±0.3 ·10 <sup>-3</sup> | 0.995 |
| 262     | NQO1 <sub>apo</sub>  | 30.2±1.3 | 44.8±1.6 | 2.7±0.3 ·10 <sup>-3</sup> | 0.995 |
|         | NQO1 <sub>holo</sub> | 21.9±1.6 | 51.9±2.1 | 1.8±0.2 ·10 <sup>-3</sup> | 0.993 |
|         | NQO1 <sub>dic</sub>  | 22.3±1.4 | 52.3±1.7 | 3.1±0.3 ·10 <sup>-3</sup> | 0.996 |
| 263     | NQO1 <sub>apo</sub>  | 31.3±1.2 | 46.6±1.5 | 2.9±0.3 ·10 <sup>-3</sup> | 0.996 |
|         | NQO1 <sub>holo</sub> | 23.5±1.6 | 53.3±2.0 | 1.8±0.2 ·10 <sup>-3</sup> | 0.993 |
|         | NQO1 <sub>dic</sub>  | 23.5±1.3 | 54.2±1.5 | 3.2±0.3 ·10 <sup>-3</sup> | 0.997 |
| 264-271 | NQO1 <sub>apo</sub>  | 32.1±1.1 | 47.9±1.3 | 3.1±0.3 ·10 <sup>-3</sup> | 0.997 |
|         | NQO1 <sub>holo</sub> | 23.8±1.5 | 55.3±1.9 | 1.9±0.2 ·10 <sup>-3</sup> | 0.995 |
|         | NQO1 <sub>dic</sub>  | 23.9±1.3 | 56.2±1.6 | 3.4±0.3 ·10 <sup>-3</sup> | 0.997 |

**Table S2. Kinetic parameters for fitting of HDX kinetics to a three-parameter exponential function for 39 experimental peptides covering almost the entire NQO1 sequence. *SLNE* indicates slow, little or no exchange. *PF* indicates poor fitting.**

| Peptide | NQO1 protein         | $A_{burst}$ (%D) | $A_{slow}$ (%D) | $k_{slow}$ (s <sup>-1</sup> ) | R <sup>2</sup> |
|---------|----------------------|------------------|-----------------|-------------------------------|----------------|
| 1-7     | NQO1 <sub>apo</sub>  | 22.3±2.7         | 15.8±2.8        | 1.3±0.6·10 <sup>-2</sup>      | 0.914          |
|         | NQO1 <sub>holo</sub> | 23.0±2.8         | 15.0±2.8        | 1.2±0.6·10 <sup>-2</sup>      | 0.898          |
|         | NQO1 <sub>dic</sub>  | 23.5±2.6         | 16.1±2.7        | 1.0±0.5·10 <sup>-2</sup>      | 0.912          |
| 7-10    | NQO1 <sub>apo</sub>  | SLNE             |                 |                               |                |
|         | NQO1 <sub>holo</sub> | SLNE             |                 |                               |                |
|         | NQO1 <sub>dic</sub>  | SLNE             |                 |                               |                |
| 11-19   | NQO1 <sub>apo</sub>  | 69.1±1.7         | 17.4±1.7        | 1.2±0.3·10 <sup>-2</sup>      | 0.971          |
|         | NQO1 <sub>holo</sub> | 32.8±0.8         | 37.4±1.1        | 1.4±0.1·10 <sup>-3</sup>      | 0.997          |
|         | NQO1 <sub>dic</sub>  | 31.2±0.2         | 6.0±0.2         | 3.4±0.4·10 <sup>-3</sup>      | 0.995          |
| 20-23   | NQO1 <sub>apo</sub>  | SLNE             |                 |                               |                |
|         | NQO1 <sub>holo</sub> | SLNE             |                 |                               |                |
|         | NQO1 <sub>dic</sub>  | SLNE             |                 |                               |                |
| 24-33   | NQO1 <sub>apo</sub>  | -1.3±0.6         | 19.5±0.9        | 8.9±1.4·10 <sup>-4</sup>      | 0.992          |
|         | NQO1 <sub>holo</sub> | -1.6±0.8         | 20.3±1.2        | 9.0±1.8·10 <sup>-4</sup>      | 0.987          |
|         | NQO1 <sub>dic</sub>  | -1.5±0.6         | 19.8±0.9        | 8.8±1.3·10 <sup>-4</sup>      | 0.993          |
| 34-39   | NQO1 <sub>apo</sub>  | 11.0±1.1         | 34.1±1.1        | 1.4±0.1·10 <sup>-2</sup>      | 0.997          |
|         | NQO1 <sub>holo</sub> | 10.9±0.9         | 34.7±0.9        | 1.4±0.1·10 <sup>-2</sup>      | 0.998          |
|         | NQO1 <sub>dic</sub>  | 10.4±0.3         | 35.1±0.3        | 1.3±0.1·10 <sup>-2</sup>      | 1.000          |
| 42-45   | NQO1 <sub>apo</sub>  | 1.6±4.2          | 77.8±6.7        | 7.7±2.2·10 <sup>-4</sup>      | 0.973          |
|         | NQO1 <sub>holo</sub> | 0.6±2.6          | 74.4±4.7        | 5.4±1.1·10 <sup>-4</sup>      | 0.986          |
|         | NQO1 <sub>dic</sub>  | 2.0±2.3          | 72.4±4.2        | 5.7±1.0·10 <sup>-4</sup>      | 0.988          |
| 46-54   | NQO1 <sub>apo</sub>  | 41.0±3.2         | 40.2±3.9        | 2.3±0.7·10 <sup>-3</sup>      | 0.964          |
|         | NQO1 <sub>holo</sub> | 33.1±3.3         | 39.2±5.2        | 7.9±3.4·10 <sup>-4</sup>      | 0.939          |
|         | NQO1 <sub>dic</sub>  | 30.1±2.3         | 25.7±3.9        | 6.5±3.1·10 <sup>-4</sup>      | 0.923          |
| 55-59   | NQO1 <sub>apo</sub>  | 83.6±2.6         | 7.1±2.6         | 3.4±2.3·10 <sup>-2</sup>      | 0.845          |

|         |                      |           |           |                          |       |
|---------|----------------------|-----------|-----------|--------------------------|-------|
|         | NQ01 <sub>holo</sub> | 58.2±0.7  | 32.9±0.7  | 1.0±0.1·10 <sup>-2</sup> | 0.998 |
|         | NQ01 <sub>dic</sub>  | 58.4±0.5  | 32.1±0.7  | 7.2±0.5·10 <sup>-4</sup> | 0.998 |
| 60-65   | NQ01 <sub>apo</sub>  | 51.0±42.8 | 41.2±42.5 | 1.2±1.0·10 <sup>-1</sup> | 0.892 |
|         | NQ01 <sub>holo</sub> | 38.1±4.1  | 53.0±4.1  | 2.8±0.5·10 <sup>-2</sup> | 0.991 |
| 66-73   | NQ01 <sub>dic</sub>  | 32.0±2.3  | 59.6±2.3  | 1.4±0.2·10 <sup>-2</sup> | 0.996 |
|         | NQ01 <sub>apo</sub>  | 52.3±5.3  | 36.6±5.2  | 6.9±1.2·10 <sup>-2</sup> | 0.985 |
|         | NQ01 <sub>holo</sub> | 26.9±1.5  | 63.5±1.5  | 1.3±0.1·10 <sup>-2</sup> | 0.998 |
| 74-87   | NQ01 <sub>dic</sub>  | 26.3±3.8  | 59.4±6.2  | 7.3±2.5·10 <sup>-4</sup> | 0.961 |
|         | NQ01 <sub>apo</sub>  | 36.9±4.6  | 39.7±5.5  | 3.3±1.4·10 <sup>-3</sup> | 0.931 |
|         | NQ01 <sub>holo</sub> | 10.7±5.1  | 60.9±5.6  | 7.0±1.8·10 <sup>-3</sup> | 0.970 |
| 88-92   | NQ01 <sub>dic</sub>  | 9.8±2.8   | 49.4±4.4  | 8.1±2.4·10 <sup>-4</sup> | 0.971 |
|         | NQ01 <sub>apo</sub>  | SLNE      |           |                          |       |
|         | NQ01 <sub>holo</sub> | SLNE      |           |                          |       |
| 92-96   | NQ01 <sub>dic</sub>  | SLNE      |           |                          |       |
|         | NQ01 <sub>apo</sub>  | 22.5±4.1  | 33.2±9.6  | 3.3±2.7·10 <sup>-4</sup> | 0.814 |
|         | NQ01 <sub>holo</sub> | 22.9±4.1  | 30.6±9.9  | 3.2±2.9·10 <sup>-4</sup> | 0.783 |
| 96-102  | NQ01 <sub>dic</sub>  | 24.5±4.0  | 29.6±9.0  | 3.5±3.1·10 <sup>-4</sup> | 0.790 |
|         | NQ01 <sub>apo</sub>  | SLNE      |           |                          |       |
|         | NQ01 <sub>holo</sub> | SLNE      |           |                          |       |
| 103-107 | NQ01 <sub>dic</sub>  | SLNE      |           |                          |       |
|         | NQ01 <sub>apo</sub>  | 19.1±3.8  | 62.5±4.5  | 4.1±0.8·10 <sup>-3</sup> | 0.981 |
|         | NQ01 <sub>holo</sub> | -6.8±2.3  | 35.5±2.8  | 2.4±0.6·10 <sup>-3</sup> | 0.977 |
| 108-113 | NQ01 <sub>dic</sub>  | SLNE      |           |                          |       |
|         | NQ01 <sub>apo</sub>  | 1.9±4.8   | 44.9±5.7  | 3.8±1.4·10 <sup>-3</sup> | 0.943 |
|         | NQ01 <sub>holo</sub> | -1.2±1.1  | 26.4±2.0  | 5.9±1.4·10 <sup>-4</sup> | 0.981 |
| 114-119 | NQ01 <sub>dic</sub>  | SLNE      |           |                          |       |
|         | NQ01 <sub>apo</sub>  | ---       | ---       | ---                      | ---   |
|         | NQ01 <sub>holo</sub> | ---       | ---       | ---                      | ---   |
|         | NQ01 <sub>dic</sub>  | ---       | ---       | ---                      | ---   |

|         |                      |          |          |                          |       |
|---------|----------------------|----------|----------|--------------------------|-------|
| 120-124 | NQO1 <sub>apo</sub>  | 32.0±5.2 | 46.1±8.2 | 8.4±4.9·10 <sup>-4</sup> | 0.893 |
|         | NQO1 <sub>holo</sub> | 23.2±2.1 | 52.8±4.2 | 4.4±1.0·10 <sup>-4</sup> | 0.980 |
|         | NQO1 <sub>dic</sub>  | SLNE     |          |                          |       |
| 125-129 | NQO1 <sub>apo</sub>  | 54.0±3.2 | 37.1±3.2 | 4.5±0.6·10 <sup>-2</sup> | 0.991 |
|         | NQO1 <sub>holo</sub> | PF       |          |                          |       |
|         | NQO1 <sub>dic</sub>  | PF       |          |                          |       |
| 129-132 | NQO1 <sub>apo</sub>  | 36.6±2.9 | 62.3±2.9 | 2.0±0.2·10 <sup>-2</sup> | 0.995 |
|         | NQO1 <sub>holo</sub> | 40.9±2.6 | 58.9±2.6 | 2.0±0.2·10 <sup>-2</sup> | 0.996 |
|         | NQO1 <sub>dic</sub>  | 19.7±0.5 | 77.7±0.5 | 9.2±0.2·10 <sup>-3</sup> | 1.000 |
| 133-141 | NQO1 <sub>apo</sub>  | 16.7±2.0 | 47.8±4.2 | 3.9±1.0·10 <sup>-4</sup> | 0.977 |
|         | NQO1 <sub>holo</sub> | 10.4±0.9 | 61.5±1.5 | 8.0±0.6·10 <sup>-4</sup> | 0.998 |
|         | NQO1 <sub>dic</sub>  | 9.6±0.7  | 15.2±0.9 | 2.6±0.5·10 <sup>-3</sup> | 0.987 |
| 142-145 | NQO1 <sub>apo</sub>  | SLNE     |          |                          |       |
|         | NQO1 <sub>holo</sub> | SLNE     |          |                          |       |
|         | NQO1 <sub>dic</sub>  | SLNE     |          |                          |       |
| 146-156 | NQO1 <sub>apo</sub>  | 47.8±1.2 | 20.6±1.4 | 3.3±0.7·10 <sup>-3</sup> | 0.982 |
|         | NQO1 <sub>holo</sub> | 33.2±0.9 | 25.7±1.1 | 4.1±0.5·10 <sup>-3</sup> | 0.993 |
|         | NQO1 <sub>dic</sub>  | 23.3±2.1 | 22.8±2.6 | 2.9±1.0·10 <sup>-3</sup> | 0.954 |
| 157-165 | NQO1 <sub>apo</sub>  | 12.5±0.8 | 23.2±1.3 | 7.4±1.3·10 <sup>-4</sup> | 0.989 |
|         | NQO1 <sub>holo</sub> | 1.5±1.3  | 26.2±2.2 | 6.7±1.8·10 <sup>-4</sup> | 0.975 |
|         | NQO1 <sub>dic</sub>  | 0.8±0.4  | 20.0±0.5 | 1.2±0.1·10 <sup>-3</sup> | 0.998 |
| 166-173 | NQO1 <sub>apo</sub>  | SLNE     |          |                          |       |
|         | NQO1 <sub>holo</sub> | SLNE     |          |                          |       |
|         | NQO1 <sub>dic</sub>  | SLNE     |          |                          |       |
| 174-181 | NQO1 <sub>apo</sub>  | SLNE     |          |                          |       |
|         | NQO1 <sub>holo</sub> | SLNE     |          |                          |       |
|         | NQO1 <sub>dic</sub>  | SLNE     |          |                          |       |
| 182-189 | NQO1 <sub>apo</sub>  | -0.2±0.2 | 19.2±0.3 | 2.9±0.1·10 <sup>-3</sup> | 0.999 |



|         |                      |          |          |                          |       |
|---------|----------------------|----------|----------|--------------------------|-------|
|         | NQ01 <sub>holo</sub> | -1.1±0.4 | 19.8±0.5 | 5.4±0.4·10 <sup>-3</sup> | 0.998 |
|         | NQ01 <sub>dic</sub>  | -1.8±0.6 | 19.9±0.7 | 4.1±0.4·10 <sup>-3</sup> | 0.996 |
| 190-201 | NQ01 <sub>apo</sub>  | 74.6±1.9 | 16.1±2.1 | 5.7±2.1·10 <sup>-3</sup> | 0.939 |
|         | NQ01 <sub>holo</sub> | 49.8±1.3 | 35.4±1.5 | 3.4±0.4·10 <sup>-3</sup> | 0.993 |
| 202-205 | NQ01 <sub>dic</sub>  | 51.2±1.7 | 31.1±2.0 | 3.2±0.6·10 <sup>-3</sup> | 0.984 |
|         | NQ01 <sub>apo</sub>  | 8.6±2.5  | 86.0±2.9 | 4.8±0.5·10 <sup>-3</sup> | 0.996 |
|         | NQ01 <sub>holo</sub> | 0.2±2.1  | 82.7±6.1 | 2.7±0.5·10 <sup>-4</sup> | 0.989 |
| 206-211 | NQ01 <sub>dic</sub>  | 1.3±2.9  | 88.2±7.6 | 2.9±0.7·10 <sup>-4</sup> | 0.982 |
|         | NQ01 <sub>apo</sub>  | -1.3±0.3 | 25.9±0.8 | 2.4±0.2·10 <sup>-4</sup> | 0.998 |
|         | NQ01 <sub>holo</sub> | SLNE     |          |                          |       |
| 212-218 | NQ01 <sub>dic</sub>  | SLNE     |          |                          |       |
|         | NQ01 <sub>apo</sub>  | 17.2±5.5 | 63.0±7.3 | 1.6±0.6·10 <sup>-3</sup> | 0.949 |
|         | NQ01 <sub>holo</sub> | 17.1±5.9 | 66.7±7.6 | 1.8±0.7·10 <sup>-3</sup> | 0.950 |
| 219-222 | NQ01 <sub>dic</sub>  | 15.6±6.1 | 69.5±7.8 | 1.8±0.7·10 <sup>-3</sup> | 0.952 |
|         | NQ01 <sub>apo</sub>  | 21.8±0.6 | 45.4±1.4 | 3.0±0.3·10 <sup>-4</sup> | 0.998 |
|         | NQ01 <sub>holo</sub> | -1.0±1.0 | 49.3±3.1 | 2.4±0.4·10 <sup>-4</sup> | 0.993 |
| 223-228 | NQ01 <sub>dic</sub>  | -0.6±0.7 | 48.0±2.0 | 2.8±0.3·10 <sup>-4</sup> | 0.996 |
|         | NQ01 <sub>apo</sub>  | 37.1±1.5 | 30.2±1.6 | 6.4±1.0·10 <sup>-3</sup> | 0.989 |
|         | NQ01 <sub>holo</sub> | 29.9±1.2 | 34.9±1.4 | 5.4±0.6·10 <sup>-3</sup> | 0.994 |
| 229-232 | NQ01 <sub>dic</sub>  | 26.6±0.8 | 37.6±0.9 | 4.8±0.3·10 <sup>-3</sup> | 0.998 |
|         | NQ01 <sub>apo</sub>  | 47.2±4.5 | 45.5±4.5 | 5.7±0.8·10 <sup>-2</sup> | 0.991 |
|         | NQ01 <sub>holo</sub> | 49.7±5.9 | 42.5±5.5 | 5.7±1.0·10 <sup>-2</sup> | 0.983 |
| 233-238 | NQ01 <sub>dic</sub>  | 41.2±0.7 | 51.0±0.6 | 1.7±0.1·10 <sup>-2</sup> | 1.000 |
|         | NQ01 <sub>apo</sub>  | 35.9±3.1 | 50.1±3.7 | 4.1±0.9·10 <sup>-3</sup> | 0.980 |
|         | NQ01 <sub>holo</sub> | 35.9±3.2 | 54.5±3.8 | 4.0±0.8·10 <sup>-3</sup> | 0.982 |
| 239-248 | NQ01 <sub>dic</sub>  | 20.8±7.7 | 58.0±9.3 | 2.7±1.4·10 <sup>-3</sup> | 0.910 |
|         | NQ01 <sub>apo</sub>  | 40.9±3.0 | 48.6±3.0 | 1.4±0.2·10 <sup>-2</sup> | 0.989 |
|         | NQ01 <sub>holo</sub> | 34.0±3.1 | 54.8±3.1 | 1.5±0.2·10 <sup>-2</sup> | 0.991 |
|         | NQ01 <sub>dic</sub>  | 34.7±2.7 | 53.9±2.7 | 1.2±0.2·10 <sup>-2</sup> | 0.992 |

|         |                      |          |          |                          |       |
|---------|----------------------|----------|----------|--------------------------|-------|
| 249-254 | NQO1 <sub>apo</sub>  | 34.8±3.1 | 30.2±4.9 | 8.5±4.5·10 <sup>-4</sup> | 0.911 |
|         | NQO1 <sub>holo</sub> | 27.7±4.4 | 35.7±6.7 | 9.0±5.6·10 <sup>-4</sup> | 0.882 |
|         | NQO1 <sub>dic</sub>  | 27.4±4.7 | 34.1±7.9 | 6.8±5.1·10 <sup>-4</sup> | 0.837 |
| 255-271 | NQO1 <sub>apo</sub>  | 28.9±1.8 | 41.0±2.2 | 2.4±0.4·10 <sup>-3</sup> | 0.989 |
|         | NQO1 <sub>holo</sub> | 22.5±1.8 | 48.3±2.4 | 1.6±0.3·10 <sup>-3</sup> | 0.990 |
|         | NQO1 <sub>dic</sub>  | 23.3±1.9 | 48.0±2.3 | 2.6±0.4·10 <sup>-3</sup> | 0.991 |

### Supplementary references

1. Medina-Carmona, E.; Neira, J.L.; Salido, E.; Fuchs, J.E.; Palomino-Morales, R.; Timson, D.J.; Pey, A.L. Site-to-site interdomain communication may mediate different loss-of-function mechanisms in a cancer-associated NQO1 polymorphism. *Scientific Reports* **2017**, *7*, 44352.
2. Kavan, D.; Man, P. MSTools-Web based application for visualization and presentation of HXMS data. *Int. J. Mass Spectrom.* **2011**, *302*, 53-58.
3. Faig, M.; Bianchet, M.A.; Talalay, P.; Chen, S.; Winski, S.; Ross, D.; Amzel, L.M. Structures of recombinant human and mouse NAD(P)H:quinone oxidoreductases: species comparison and structural changes with substrate binding and release. *Proc Natl Acad Sci U S A* **2000**, *97*, 3177-3182.
4. Asher, G.; Dym, O.; Tsvetkov, P.; Adler, J.; Shaul, Y. The crystal structure of NAD(P)H quinone oxidoreductase 1 in complex with its potent inhibitor dicoumarol. *Biochemistry* **2006**, *45*, 6372-6378.
